# Supplementary material for: Correction to: The low-copy nuclear gene Agt1 as a novel DNA barcoding marker for Bromeliaceae
Source: BMC Plant Biol. 2020 Dec 30;20:567. doi: 10.1186/s12870-020-02743-3 (PMC7774240; doi:10.1186/s12870-020-02743-3)
Supplement: Supplementary file 1 — Additional file 1: Incorrect version of Additional file 1. [file 12870_2020_2743_MOESM1_ESM.xlsx]

## Sheet: agt1_matK
Species	Source	Accession-Number	Origin	Collector / Determination	Herbarium	Agt1 (GenBank #)	matK (GenBank #)	Sequence_ID
Guzmania monostachia (L.) Rusby ex Mez	BG Göttingen	96-090209		Schwerdtfeger	FR	MT038881		BRC464
Guzmania danielii L.B.Sm.	BG Göttingen	B 1183	Bolivia	T. Krömer	FR	MT038880		BRC462
Tillandsia flagellata L.B.Sm.	BG Göttingen	B 1225	Ecuador	Heidt	FR	MT038888		BRC483
Tillandsia kegeliana Mez	BG Göttingen	B 1246		BG Linz	FR	MT038887		BRC481
Tillandsia pamelae Rauh	BG Göttingen	B 1329	Mexico, Ayutla-Talapa de Allende EM 902201*	Ehlers	FR	MT038891		BRC492
Vriesea albo-rubrobracteata	BG Göttingen	B 1477	Peru	Prinsler	FR	MT038894		BRC500
Wallisia anceps (Lodd.) Barfuss & W.Till	BG Göttingen	B 1764	Guayana, Atachi, Baeca	B. Leuenberger	FR	MT038885		BRC470
Tillandsia moronesensis Ehlers	BG Göttingen	B 1796	Mexico, Michoacan,Sierra Morena, Tlaltenango-San José	Ehlers	FR	MT038890		BRC489
Tillandsia ionochroma André ex Mez (Nom. nov.)	BG Göttingen	B 1833	Ecuador, Loja, Quenca, 2800 m	Hase	FR	MT038878		BRC479
Racinaea tetrantha (Ruiz & Pav.) M.A.Spencer & L.B.Sm.	BG Göttingen	B 1884	Ecuador	Hase	FR	MT038884		BRC468
Tillandsia sceptriformis Mez & Sodiro	BG Göttingen	B 1886	Ecuador, Quito	Hase	FR	MT038892		BRC495
Guzmania zahnii (Hook.f.) Mez	BG Göttingen	B 269	Costa Rica		FR	MT038883		BRC466
Guzmania scherzeriana Mez	BG Göttingen	B 297	Costa Rica, Kolumbien, Ecuador	Prinsler & Werner	FR	MT038882		BRC465
Vriesea procera	BG Göttingen	B 324	Brazil	Sehscharf	FR	MT038896		BRC506
Vriesea simplex	BG Göttingen	B 326		BG Berlin-Dahlem	FR	MT038897		BRC508
Tillandsia somnians L.B.Sm	BG Göttingen	B 584			FR	MT038893		BRC497
Tillandsia paleacea var. Minor C.Presl	BG Göttingen	B 628	Peru, Rio Urubamba, Valle Sagrada de los Incas	U. Scharf	FR	MT038877		BRC491
Vriesea heliconioides	BG Göttingen	B 751	Columbia		FR	MT038895		BRC504
Tillandsia mooreana L.B.Sm. (Nom. nov.)	BG Göttingen	L92/22	old garden stock with unknown origin	Lautner	FR	MT038889		BRC487
Tillandsia jaliscomonticola Matuda	BG Göttingen	L9825	Mexico	BG Linz	FR	MT038886		BRC480
Tillandsia usneoides (L.) L.	BG Heidelberg	HEID 100246	Peru, Ancash, km 14 südlich von Piscobamba	L. Hromadnik		MT038723		BRC399
Tillandsia usneoides (L.) L.	BG Heidelberg	HEID 100253	Mexico, Jalisco, Jilotlan - Tecalitlan	L. Hromadnik		MT038722		BRC398
Tillandsia usneoides (L.) L.	BG Heidelberg	HEID 100265	Mexico, Oaxaca, Felswand oberhalb Guelatao	L. Hromadnik		MT038724		BRC400
Tillandsia usneoides (L.) L.	BG Heidelberg	HEID 100268	Bolivia, Tarija, 1 km Navarez - Entre Rios	L. Hromadnik		MT038725		BRC402
Tillandsia usneoides (L.) L.	BG Heidelberg	HEID 100273	Bolivia, Cochabamba, oberhalb Morochata	L. Hromadnik		MT038726		BRC403
Tillandsia australis Mez	BG Heidelberg	HEID 100439	Bolivia, Tarija, 1 km Navarez - Entre Rios	H. & L. Hromadnik	WU 0004231	MT038752		BRC171
Tillandsia landbeckii Philippi	BG Heidelberg	HEID 100441	Peru, Lima, between La Molina & Cieneguilla	L. Hromadnik		MT038715		BRC382
Tillandsia landbeckii Phil. ssp. landbeckii	BG Heidelberg	HEID 100441	Peru, Lima, between La Molina & Cieneguilla	L. Hromadnik		MT047577		HEID 100441
Tillandsia landbeckii ssp. andina W.Till	BG Heidelberg	HEID 100442	Peru, Ancash Region, above Chavin	L. Hromadnik		MT047573		HEID 100442
Tillandsia landbeckii Philippi	BG Heidelberg	HEID 100442	Peru, Ancash, above Chavin	L. Hromadnik		MT038713		BRC380
Fosterella chaparensis Ibisch, R.Vasquez & E.Gross	BG Heidelberg	HEID 101271	Bolivia	T. Krömer	FR-0082327; HEID 207324	MT047521		BRC130
Guzmania calothyrsus Mez	BG Heidelberg	HEID 101308	Bolivia	T. Krömer		MT038797		BRC135
Werauhia pectinata (L.B.Sm.) J.R.Grant	BG Heidelberg	HEID 101394	Guatemala, Baja Verapaz, between Ranchitos del Quetzal & Cobán km 144	J. Lautner	U/L	MT038872		BRC365
Hohenbergia distans (Grisebach) Baker	BG Heidelberg	HEID 102378	Jamaica	Fleming	HEID 207325, HEID 207320, HEID 600424	MT038634	MT026361	BE443
Deuterocohnia brevispicata Rauh & L.Hrom.	BG Heidelberg	HEID 102379	Bolivia, Santa Cruz, between Muju-Pampa & Monteagudo	L. Hromadnik	HEID 205138, HEID 602074, HEID 602073	MT047531		BRC194
Racinaea fraseri (Baker) M.A.Spencer & L.B.Sm.	BG Heidelberg	HEID 102394	Ecuador, Pichincha Guayabamba	W. Rauh	HEID 603940, HEID 603561, HEID 603953, HEID 603562, HEID 603563, HEID 205141	MT038772		BRC208
Racinaea multiflora (Benth.) M.A.Spencer & L.B.Sm.	BG Heidelberg	HEID 102430	Ecuador, Azuay, Cuenca-Giron, Sta.Isabel bis zur Paßhöhe km 104	W. Rauh		MT038773		BRC271
Racinaea pugiformis (L.B.Sm.) M.A.Spencer & L.B.Sm.	BG Heidelberg	HEID 102487	Ecuador, Azuay, bei Cuenca - Giron	W. Rauh	HEID 604039, HEID 602428, HEID 601935, HEID 202007, HEID 202246	MT038807		BRC177
Racinaea ropalocarpa (André) M.A.Spencer & L.B.Sm.	BG Heidelberg	HEID 102490	Peru, Amazonas Mendoza - Omia	W. Rauh		MT038771		BRC051
Racinaea spiculosa (Griseb.) M.A.Spencer & L.B.Sm.	BG Heidelberg	HEID 102500	Bolivia, Solacana	M. Miyagawa	FR-0035389; HEID 604263, HEID 603946	MT038811		BRC193
Catopsis sessiliflora (Ruiz & Pav.) Mez	BG Heidelberg	HEID 102583	Mexico, 10 km vor Huatla	R. Ehlers	FR-0083366	MT038790		BRC046
Werauhia viridiflora (Regel) J.R.Grant	BG Heidelberg	HEID 102739	Costa Rica	C.K. Horich		MT038778		BRC099
Billbergia kuhlmannii L.B.Smith	BG Heidelberg	HEID 102974	old garden stock with unknown origin	Bundesgärten Wien		MT038681		BE432
Tillandsia ionantha Planch.	BG Heidelberg	HEID 103010	Guatemala, El Rancho	W. Rauh		MT047479		BRC437
Tillandsia kammii Rauh	BG Heidelberg	HEID 103012	Honduras, Olancho, Ö von Juticalpa bei Catacamas	W. Rauh		MT038859		BRC331
Tillandsia oblivata L.Hrom.	BG Heidelberg	HEID 103018	Peru, Cajamarca - La Libertad	W. Rauh	HEID 604225	MT038864		BRC340
Tillandsia baguagrandensis Rauh	BG Heidelberg	HEID 103020	Peru, Apurimac, Maranon-Tal	R. Ehlers		MT047481		BRC457
Tillandsia lorentziana Griseb.	BG Heidelberg	HEID 103021	Argentina, bei Salta	W. Rauh		MT038841		BRC281
Wittmackia lingulata (L.) Mez	BG Heidelberg	HEID 103024	Brazil, Bahia, State, Morro do Chapéu	W. Rauh		MT038635		BE453
Hohenbergiopsis guatemalensis (L.B.Smith) L.B.Smith & R.W.Read	BG Heidelberg	HEID 103058	Guatemala	W. Rauh	HEID 201352	MT038617		BE442
Vriesea elata (Baker) L.B.Sm.	BG Heidelberg	HEID 103074	Kolumbien, Sierra Nevada, St.Lorenzo	Uhig	HEID 602452, HEID 602451, HEID 602450, HEID 602449, HEID 602448	MT038817		BRC213
Aechmea mariae-reginae H.Wendland	BG Heidelberg	HEID 103080	Costa Rica, Cartago, Cervantes	W. Rauh		MT038685		BE460
Pitcairnia riparia Mez	BG Heidelberg	HEID 103083	Ecuador, Limon, 15 km vor Gualaquiza	K. Senghas	HEID 603831, HEID 603857	MT047524		BRC138
Quesnelia edmundoi L.B.Smith var. Edmundoi	BG Heidelberg	HEID 103155	old garden stock with unknown origin	E. Groß	FR-0035505	MT038515		BE475
Tillandsia cochabambae E.Gross & Rauh	BG Heidelberg	HEID 103158	Bolivia, im Tal von Cochabamba auf Felsen dichte Bestände bildend.	W. Rauh	HEID 607598	MT038740		BRC350
Tillandsia krahnii Rauh	BG Heidelberg	HEID 103167	Peru, Ancash, 17km nördlich von San Luis bei Luzuriaga am Rio Ashnucancha an Felsen	W. Krahn	HEID 607669	MT038833		BRC260
Catopsis paniculata E.Morren	BG Heidelberg	HEID 103270	Honduras Choluteca, San Marcos de Colón	W. Rauh	HEID 601931	MT038786		BRC217
Catopsis hahnii Baker	BG Heidelberg	HEID 103302	Honduras Tegucigalpa	W. Rauh		MT038809		BRC183
Catopsis nutans (Sw.) Griseb.	BG Heidelberg	HEID 103303	Mexico, Chiapas zwischen Tapachula und La Patria, 35 km vor Arriaga	W. Rauh	HEID 603548-HEID 603551, HEID 603713-HEID 603718, HEID 603823-HEID 603829, HEID 603852-HEID 603855	MT038783		BRC045
Catopsis nutans (Sw.) Griseb.	BG Heidelberg	HEID 103310	Mexico, Veracruz, Fortin de las Flores, Orizaba auf Casuarina	W. Rauh	HEID 603112, HEID 603113	MT038784		BRC073
Fosterella caulescens Rauh	BG Heidelberg	HEID 103532	Bolivia, Yungas zwischen La Paz und Catanavia	W. Rauh	FR-0030848; HEID 602174	MT047499		BRC067
Guzmania roseiflora Rauh	BG Heidelberg	HEID 103561	Ecuador, Santo Domingo de los Tsáchilas, Santo Domingo , Santo Domingo	W. Rauh	HEID 602240	MT047471		BRC144
Pitcairnia elvirae D.C.Taylor & H.Rob.	BG Heidelberg	HEID 103564	Ecuador, zwischen Baeza (Prov. Napo) und Lago Agrio (Prov. Sucumbíos)	W. Rauh	HEID 602326	MT047517		BRC119
Tillandsia ixioides Griseb.	BG Heidelberg	HEID 103569	Argentina, Quebrado-Wald bei Tucuman	W. Rauh		MT038736		BRC306
Tillandsia lymanii Rauh	BG Heidelberg	HEID 103571	Peru, Cajamarca, am Rio Chancay östlich der Rio Chancay - Brücke an der Straße nach Santa Cruz zwischen km 6 und km 15	W. Rauh	HEID 607702	MT038751		BRC288
Tillandsia spiraliflora Rauh	BG Heidelberg	HEID 103579	Peru, Cajamarca, Marañon-Tal, 20 km oberhalb Balsas	W. Rauh	HEID 603809	MT038763		BRC295
Goudaea ospinae (H.Luther) W.Till & Barfuss	BG Heidelberg	HEID 103585	Colombia, Los Llanos	F.-G. Gruber	HEID 605069	MT038777		BRC355
Pitcairnia recurvata (Scheidweiler) C.Koch	BG Heidelberg	HEID 103587	Mexico, Est. Chiapas zwischen Tuxtla Gutiérrez und Pichucalco	W. Rauh		MT047515		BRC116
Tillandsia marconae W.Till & Vitek	BG Heidelberg	HEID 103591	Peru, Arequipa Camana	W. Rauh		MT038857		BRC323
Tillandsia marconae W.Till & Vitek	BG Heidelberg	HEID 103591	Peru, Caylloma, Distrito Majes, near Majes, Pampa del Torro	W. Rauh		103591_2: MT047543, 103591_3: MT047544, 103591_1: MT047545		HEID 103591
Aechmea gracilis Lindman	BG Heidelberg	HEID 103595	Brazil, State of Minas Gerais, route to Conselheiro Mata, 1200 m	A.F.H. Buining	FR-0083399	MT038568		BE448
Catopsis subulata L.B.Sm.	BG Heidelberg	HEID 103598	Mexico, Chiapas, near (30 km) Tuxtla	W. Rauh		MT038812		BRC195
Billbergia vittata Brongniart	BG Heidelberg	HEID 103607	Brazil, Bahia, Aocon	A.F.H. Buining	HEID 602908	MT038559	MT026297	BE464
Catopsis nutans (Sw.) Griseb.	BG Heidelberg	HEID 103623	Mexico, Chiapas, Rizo de Oro, La Mina Microonda	W. Rauh		MT038785		BRC075
Aechmea nudicaulis (L.) Griseb.	BG Heidelberg	HEID 103631	Costa Rica, Alajuela, Poás Volcano	W. Rauh		MT047492		BRC412
Billbergia euphemiae var. Nudiflora L.B.Smith	BG Heidelberg	HEID 103634	Brazil, Guarujá Island	W. Rauh	HEID 602882	MT038558	MT026298	BE457
Guzmania variegata L.B.Sm.	BG Heidelberg	HEID 103637	Peru	W. Rauh	HEID 605003	MT038801		BRC141
Fosterella micrantha (Lindl.) L.B.Sm.	BG Heidelberg	HEID 103726	Guatemala, Suchitepéquez between Cocales & San Lucas Toliman near Santa Teresa	W. Welz	FR-0082279; HEID 602120	MT047505		BRC087
Nidularium campo-alegrense Leme	BG Heidelberg	HEID 103734	Brazil, State of Santa Catarina, Campo Alegre, way to Morro do Iquererim (Quiriri)	E. Leme	WU 0007053	MT038684		BE459
Neoregelia lactea H.Luther & Leme	BG Heidelberg	HEID 103744	Brazil, State of Rio de Janeiro, Teresopolis, near border to Nova Friburgo, way to Tres Picos	E. Leme		MT038604	MT026330	BE463
Tillandsia atenangoensis Ehlers & Wuelfinghoff	BG Heidelberg	HEID 103763	Mexico, Oaxaca, hinter San Agustin Atenango an der Oax 15 bei km 61	J. Lautner		MT038828		BRC247
Aechmea nudicaulis (L.) Griseb.	BG Heidelberg	HEID 103783	Brazil, 12 km E Diamantina	W. Rauh	FR-0035433, FR-0083413, FR-0083414	MT047489		BRC391
Pitcairnia prolifera Rauh	BG Heidelberg	HEID 103788	Peru, Piura, bei Ayabaca	W. Rauh	HEID 603859	MT047522		BRC133
Ronnbergia petersii L.B.Smith	BG Heidelberg	HEID 103813	Panama, Panamá Province, Cerro Jefe	W. Rauh	FR-0035510; HEID 603947	MT038633	MT026356	BE423
Aechmea hoppii (Harms) L.B.Smith	BG Heidelberg	HEID 103873	Colombia, Putumayo, Orito	W. Rauh	FR-0035363; HEID 602548	MT038457		BE449
Tillandsia gerdae Ehlers	BG Heidelberg	HEID 103898	Bolivia, Cochabamba, bei Capinota	R. Ehlers		MT038868		BRC349
Tillandsia kirschnekii Rauh & W.Till	BG Heidelberg	HEID 103946	Peru	E. Kirschnek	U/L	MT038742		BRC246
Vriesea maxoniana (L.B.Sm.) L.B.Sm.	BG Heidelberg	HEID 103963	Peru, Pasco Oxapampa, Nebelwald	W. Rauh	HEID 205024	MT038779		BRC362
Guzmania osyana (E.Morren) Mez	BG Heidelberg	HEID 103965	Ecuador, Pichincha, Cotopaxi und El Oro, an der alten Straße nach Quito Selva Negra	W. Rauh	HEID 602234	MT038800		BRC140
Guzmania multiflora (André) André ex Mez	BG Heidelberg	HEID 103966	Ecuador, Napo, Quijos , near Muy Noble y Muy Leal Ciudad de Baeza del Espíritu Santo de la Nueva Andalucía	W. Rauh	HEID 603194	MT038806		BRC176
Hechtia guatemalensis Mez	BG Heidelberg	HEID 103967	Honduras, 45 km W Tegucigalpa	W. Rauh		MN954673		BRC023
Aechmea mexicana Baker	BG Heidelberg	HEID 104025	Ecuador, Santo Domingo de los Colorados - Esmeraldas, 100 m	W. Rauh	FR-0035378	MT038620		BE461
Tillandsia usneoides (L.) L.	BG Heidelberg	HEID 104028	Guatemala, Quiché, hinter Sta. Cruz del Quiché, Straße nach San Bartolomé Jocotenango	Radtke & Moldenhauer		MT038721		BRC396
Fosterella rusbyi (Mez) L.B.Sm.	BG Heidelberg	HEID 104031	Bolivia, Yungas	W. Rauh	HEID 602045, HEID 602121	MT047503		BRC084
Catopsis morreniana Mez	BG Heidelberg	HEID 104032	Guatemala, Alta Verapaz, Cobán	W. Rauh	HEID 602973	MT038787		BRC234
Pitcairnia reflexiflora André	BG Heidelberg	HEID 104224	Ecuador, Prov. Azuay, zwischen Gualaceo und San Juan del Bosque Bergwald	K. Senghas	HEID 602470	MT047514		BRC115
Pitcairnia villetaensis Rauh	BG Heidelberg	HEID 104225	Colombia, between Bogota & Villeta	W. Rauh	HEID 602492	MT047516		BRC117
Tillandsia aeranthos (Loisel.) L.B.Sm.	BG Heidelberg	HEID 104227	Brazil, Rio Grande do Sul, am Rio Toropi	W. Rauh		MT047475		BRC296
Tillandsia cardenasii L.B.Sm.	BG Heidelberg	HEID 104237	Bolivia, Tarija, Cieneguillas	E. Haugg		MT038835		BRC264
Pitcairnia carnososepala Rauh & Gross	BG Heidelberg	HEID 104242	Ecuador, near Mora, 500 m	W. Rauh	HEID 602364	MT047509		BRC108
Tillandsia butzii Mez	BG Heidelberg	HEID 104246	Guatemala, Alta Verapaz, Cobán	W. Rauh		MT047477		BRC430
Aechmea miniata (Beer) hortus ex Baker var. indet.	BG Heidelberg	HEID 104304	Brazil, State of Pernambuco, near Gravatá	G. Pfister		MT038537		BE446
Tillandsia filifolia Schltdl. & Cham.	BG Heidelberg	HEID 104357	Honduras, Olancho, östlich von Juticalpa bei Catacamas.	W. Rauh		MT038759		BRC204
Tillandsia disticha Kunth	BG Heidelberg	HEID 104477	Ecuador, Manabi Jipijapa, Guayaquit - Manba	W. Rauh	HEID 603582	MT038770		BRC326
Tillandsia didisticha (E.Morren) Baker	BG Heidelberg	HEID 104479	Argentinien, Salta, Guenas, an der Strasse nach Santa Clara	W. Rauh		MT038738		BRC320
Tillandsia ionantha Planch.	BG Heidelberg	HEID 104512	Mexico, Chiapas, N von Tuxtla Gutierrez Sumidero Canyon	A. Lau jr.		MT047463		BRC434
Tillandsia esseriana Rauh & L.B.Sm.	BG Heidelberg	HEID 104516	Paraguay	G. Esser		MT038831		BRC254
Tillandsia ionantha Planch.	BG Heidelberg	HEID 104536	Honduras, Choluteca, Choluteca	W. Rauh		MT038764		BRC305
Tillandsia ionantha Planch.	BG Heidelberg	HEID 104536	Honduras, Choluteca, Choluteca	W. Rauh		MT047480		BRC438
Tillandsia mima L.B.Sm.	BG Heidelberg	HEID 104551	Ecuador, Azuay, Santa Isabel, Santa Isabel (Chaguarurco), Valle del Río Jubones	W. Rauh		MT038840		BRC280
Tillandsia rauhii L.B.Sm.	BG Heidelberg	HEID 104552	Peru, Cajamarca, San Miguel, La Florida, La Florida, near Puente El Papayo	W. Rauh		MT038749		BRC186
Tillandsia incarnata Kunth	BG Heidelberg	HEID 104553	Ecuador, Azuay, bei Cuenca	W. Rauh		MT047473		BRC239
Tillandsia werdermannii Harms	BG Heidelberg	HEID 104565	Peru, Tacna, oberhalb von Tacna	W. Rauh		MT047578		HEID 104565
Tillandsia xiphioides Ker Gawl.	BG Heidelberg	HEID 104567	Argentina, Salta, bei Salta	W. Rauh		MT047461		BRC455
Aechmea allenii L.B.Smith	BG Heidelberg	HEID 104587	Panama, El Hano	W. Rauh	FR-0035408	MT038683		BE435
Guzmania bracteosa (André) André ex Mez	BG Heidelberg	HEID 104594	Ecuador, W Quito	W. Rauh	HEID 603242	MT038798		BRC137
Pitcairnia atrorubens (Beer) Baker	BG Heidelberg	HEID 104598	Guatemala, near Escuitla	W. Rauh	HEID 606240	MT047507		BRC103
Pitcairnia corallina Linden & André	BG Heidelberg	HEID 104602	old garden stock with unknown origin		HEID 600490	MT047496		BRC032
Tillandsia remota Wittm.	BG Heidelberg	HEID 104699	Guatemala, Esquipulas	J. Marx & T. Stolten		MT038760		BRC240
Tillandsia capillaris f. virescens (Ruiz & Pav.) L.B.Sm.	BG Heidelberg	HEID 104848	Bolivia, Tarija, between Tojo & Yunchara	L. Hromadnik		MT047542		HEID 104848
Tillandsia capillaris Ruiz & Pav.	BG Heidelberg	HEID 104848	Bolivia, Tarija, Tojo-Yunchara	L. Hromadnik		MT038728		BRC416
Tillandsia purpurea Ruiz & Pav.	BG Heidelberg	HEID 104854	Peru, Chiclayo-Lima, Wüste bei Cajamarquilla	W. Rauh	HEID 603751	MT038756		BRC299
Tillandsia purpurea Ruiz & Pav.	BG Heidelberg	HEID 104854	Peru, Lima, Lurigancho-Chosica District, near Chambala, Ruinas de Cajamarquilla	W. Rauh	HEID 603751	104854_1: MT047549, 104854_2: MT047550, 104854_3: MT047551, 104854: MT047552		HEID 104854
Aechmea smithiorum var. Longistipitata E.Gross	BG Heidelberg	HEID 104855	Windward Islands, Saint Vincent and the Grenadine, Saint Vincent, Balzine Falls, N Windsor Forest	C. Innes	HEID 602138	MT038679		BE422
Tillandsia teres L.B.Sm.	BG Heidelberg	HEID 104861	Peru, Cajamarca, Cumbil-Llama	W. Rauh	P01761236; HEID 603840	MT038750		BRC210
Pitcairnia utcubambensis Rauh	BG Heidelberg	HEID 104868	Peru, Amazonas, Tal des Rio Utcubamba bei Tingo Maria	W. Rauh & K. von Bismarck	HEID 602486	MT047520		BRC129
Pitcairnia wendlandii Baker	BG Heidelberg	HEID 104942	Guatemala, Suchitepequez, CA2 nach Mazatenango 10, 9 km nach Abzweig Tiquisate	B. Radtke & A. Moldenhauer	GH 31955	MT047518		BRC121
Pitcairnia wendlandii Baker	BG Heidelberg	HEID 104942	Guatemala, Suchitepequez, CA2 nach Mazatenango, 10,9 km nach Abzweig Tiquisate	B. Radtke & A. Moldenhauer	GH 31955	MT047500		BRC070
Pitcairnia chiapensis Miranda	BG Heidelberg	HEID 104944	Mexico, State of Chiapas, 5 miles S Tuxtla Gutiérrez	W. Rauh	HEID 603541	MT047512		BRC112
Tillandsia chiletensis Rauh	BG Heidelberg	HEID 105076	Peru, Cajamarca, Tal von Cajamarca - Chilete.	W. Rauh	HEID 607589	MT038855		BRC319
Lemeltonia dodsonii (L.B.Sm.) Barfuss & W.Till	BG Heidelberg	HEID 105078	Ecuador, Pichincha bei Santo Domingo	W. Rauh	HEID 602431, HEID 602432	MT038792		BRC053
Tillandsia mollis H.Hrom. & W.Till	BG Heidelberg	HEID 105083	Bolivia Tarija, Cumbre del Condor	L. Hromadnik	WU 0001351	MT038819		BRC224
Tillandsia recurvata (L.) L.	BG Heidelberg	HEID 105087	Mexico, Puebla, Puebla	W. Rauh		105087_1: MT047560, 105087_2: MT047561, 105087_3: MT047562		HEID 105087
Vriesea sparsiflora L.B.Sm.	BG Heidelberg	HEID 105097	Brazil, Rio de Janeiro, Alto Macal	R. Ehlers	HEID 605077	MT038816		BRC211
Fosterella weberbaueri (Mez) L.B.Sm.	BG Heidelberg	HEID 105332	Bolivia, Cochabamba, Chapare, Carrasco National Park	T. Krömer	HEID 602124, HEID 602131	MT047504		BRC085
Ursulaea macvaughii (L.B.Smith) R.W.Read & H.U.Baensch	BG Heidelberg	HEID 105622	old garden stock with unknown origin	BG Wien	HEID 207655	MT038618		BE445
Deuterocohnia abstrusa (A.Cast.) N.Schütz	BG Heidelberg	HEID 105680	Bolivia, Tarija, border to Argentinia near Cañas	C. S. Gouda		MT047532		BRC291
Tillandsia seleriana Mez	BG Heidelberg	HEID 105798	Mexico, Oaxaca, Santo Domingo Yanhuitlán (municipality) ca. 2 km NE Santo Domingo Yanhuitlán at MEX-190	W. Rauh		MT038852		BRC313
Tillandsia delicata Ehlers	BG Heidelberg	HEID 107055	Mexico, Oaxaca, Mixtepec	E. Zecher		MT038873		BRC387
Tillandsia nizandaensis Ehlers	BG Heidelberg	HEID 107116	Mexico, Oaxaca, nahe Nizanda	R. Ehlers		MT038847		BRC307
Tillandsia ionantha Planch.	BG Heidelberg	HEID 107117	Mexico, Oaxaca, am Rio Huamenula	R. Ehlers		MT038768		BRC406
Tillandsia atroviridipetala Matuda	BG Heidelberg	HEID 107126	Mexico, Jalisco, von Mazamitla in Richtung Zamora	R. Ehlers		MT038867		BRC348
Tillandsia grandispica Ehlers	BG Heidelberg	HEID 107133	Mexico, Jalisco, von Tecotitlan in Richtung Quila Weg Microonda	R. Ehlers		MT038863		BRC337
Tillandsia ionantha Planch.	BG Heidelberg	HEID 107136	Mexico, Guerrero, von Saltero nach Altamirano km 100	R. Ehlers		MT038769		BRC408
Tillandsia capillaris Ruiz & Pav.	BG Heidelberg	HEID 107150	Argentina, Jujuy, Humahuaca	L. Hromadnik		MT038731		BRC422
Tillandsia capillaris Ruiz & Pav.	BG Heidelberg	HEID 107161	Argentina, La Rioja, Chilecito	L. Hromadnik		MT038734		BRC426
Deuterocohnia brevifolia (Griseb.) M.A.Spencer & L.B.Sm.	BG Heidelberg	HEID 107456	Bolivia, Tarija, E Santa Ana	L. Hromadnik		MT047525		BRC146
Tillandsia aizoides Mez	BG Heidelberg	HEID 107524	Bolivia, Potosi, Berge NÖ von R. Tumusla	L. Hromadnik		MT038876		BRC418
Tillandsia juergrutschmannii Rauh	BG Heidelberg	HEID 107529	Mexico, Chiapas, Parque Nacional Sumidero	L. Hromadnik		MT038765		BRC371
Tillandsia guerreroensis Rauh	BG Heidelberg	HEID 107530	Mexico, Guerrero, Tierra Colorada km5 Abzweig Ayutla	L. Hromadnik		MT038824		BRC236
Tillandsia funebris A.Cast.	BG Heidelberg	HEID 107531	Bolivia, Cochabamba, Aiquile - Rio Grande	L. Hromadnik		MT038712		BRC351
Tillandsia mirabilis L.Hrom.	BG Heidelberg	HEID 107535	Mexico, Guerrero, Zoyapesco, W Petatlan	L. Hromadnik	WU 0004673	MT038830		BRC252
Tillandsia xiphioides Ker Gawl.	BG Heidelberg	HEID 107555	Argentina, San Luis, oberhalb San Francisco del Monte de Oro	L. Hromadnik		MT047460		BRC452
Tillandsia plagiotropica Rohweder	BG Heidelberg	HEID 107558	El Salvador, Ahuachapán, Laguna de las Ninfas	J. Marx & T. Stolten		MT038874		BRC388
Tillandsia comulcoensis Ehlers	BG Heidelberg	HEID 107938	Mexico, Oaxaca, Calipan	R. Ehlers		MT038866		BRC344
Tillandsia capitata Griseb.	BG Heidelberg	HEID 107941	Mexico, Oaxaca, Temascal	R. Ehlers		MT038829		BRC248
Tillandsia guenthernolleri Ehlers	BG Heidelberg	HEID 107942	Mexico, Jalisco, Rio Marabasco	R. Ehlers		MT038805		BRC173
Tillandsia kauffmannii Ehlers	BG Heidelberg	HEID 107989	Peru, La Libertad, nahe Coina	R. Ehlers		MT038746		BRC366
Tillandsia geissei Phil.	BG Heidelberg	HEID 108216	Chile, Antofagasta, 5 km N Paposo	J. Saul		MT047579		HEID 108216
Tillandsia malzinei (E.Morren) Baker	BG Heidelberg	HEID 108286	Mexico, Oaxaca, Temascal	R. Ehlers	HEID 204660	MT047501		BRC076
Catopsis nutans (Sw.) Griseb.	BG Heidelberg	HEID 108463	Costa Rica, Cordilliera de Tilaran, vor St. Elena	J. Claus		MT038782		BRC044
Tillandsia xiphioides Ker Gawl.	BG Heidelberg	HEID 108668	Bolivia, Rio Grande- Serano vor Compo Redondo	R. Ehlers		MT038741		BRC410
Tillandsia hegeri Ehlers	BG Heidelberg	HEID 108752	Bolivia, El Puente	R. Ehlers		MT038875		BRC390
Tillandsia atroviolacea Ehlers & Koide	BG Heidelberg	HEID 108794	Mexico, San Mateo	R. Ehlers		MT038838		BRC272
Tillandsia guatemalensis L.B.Sm.	BG Heidelberg	HEID 109089	El Salvador, Ahuachapan, am Gipfel des Cerro Yupe, nahe dem El Chingo	J. Marx		MT038766		BRC389
Tillandsia usneoides (L.) L.	BG Heidelberg	HEID 109235	Ecuador, Azuay, 9 km südlich von Cuenca	L. Hromadnik		MT038711		BRC300
Pitcairnia staminea Lodd.	BG Heidelberg	HEID 109350	Brazil, Rio de Janeiro	E. Leme		MT047508		BRC105
Catopsis nutans (Sw.) Griseb.	BG Heidelberg	HEID 109426	Salvador	J. Marx		MT038781		BRC043
Nidularium innocentii Lemaire var. Innocentii	BG Heidelberg	HEID 109837	Brazil, State of Rio de Janeiro, Serra dos Órgãos National Park, SW Teresopolis, 1000–1100 m	W. & S. Till	WU 0007414	MT038603	MT026336	BE458
Tillandsia landbeckii Phil.	BG Heidelberg	HEID 112451	Chile, Atacama Desert, Tarapacá Region, ca. 30 km SSW Iquique	A. Siegmund		MT047576		HEID 112451
Tillandsia landbeckii Philippi	BG Heidelberg	HEID 112451	Chile, Atacama Desert, Tarapacá, ca. 30 km SSW Iquique	A. Siegmund		MT038718		BRC385
Tillandsia landbeckii Philippi	BG Heidelberg	HEID 112534	Chile, Atacama Desert, Onjabide	A. Siegmund		MT038716		BRC383
Tillandsia landbeckii Phil.	BG Heidelberg	HEID 112534	Chile, Atacama Desert, Onjabide	A. Siegmund		MT047575		HEID 112534
Tillandsia landbeckii Philippi	BG Heidelberg	HEID 113094	Peru, Quispicanchi, valley of the Río Vilcanota near Huancarpay 13 km N Andahuaylillas	W. Till & E. Vitek	WU 0001965	MT038717		BRC384
Tillandsia landbeckii var. rigidor W.Till	BG Heidelberg	HEID 113094	Peru, Quispicanchi, valley of the Río Vilcanota, near Huancarpay, 13 km N Andahuaylillas	W. Till & E. Vitek	WU 0001965	MT047574		HEID 113094
Tillandsia landbeckii ssp. andina W.Till	BG Heidelberg	HEID 113095	Peru			MT047572		HEID 113095
Tillandsia landbeckii ssp. andina W.Till	BG Heidelberg	HEID 113096	Peru			MT047571		HEID 113096
Tillandsia landbeckii ssp. andina W.Till	BG Heidelberg	HEID 113097	Peru, Lima Region, Oyón, Churin	R. Ehlers		MT047570		HEID 113097
Tillandsia landbeckii Philippi	BG Heidelberg	HEID 113097	Peru, Lima, Oyón, Churin	R. Ehlers		MT038719		BRC386
Tillandsia landbeckii Philippi	BG Heidelberg	HEID 113098	Peru, Ancash, Huaraz, along the road from Huaraz to Casma S Chuchuajirca	E. Vitek		MT038714		BRC381
Tillandsia landbeckii ssp. andina W.Till	BG Heidelberg	HEID 113098	Peru, Ancash, Huaraz, along the road from Huaraz to Casma S Chuchuajirca	E. Vitek		MT047569		HEID 113098
Tillandsia landbeckii ssp. andina W.Till	BG Heidelberg	HEID 113099	Peru	W. Till		113099_3: MT047536, 113099_1: MT047537		HEID 113099
Deuterocohnia digitata L.B.Sm.	BG Heidelberg	HEID 130000	Argentina, Salta, nahe TinTin	W. Rauh	HEID 602033	MT047528		BRC164
Deuterocohnia strobilifera Mez	BG Heidelberg	HEID 130015	Bolivia	L. Hromadnik	HEID 603110	MT047527		BRC163
Dyckia granmogulensis Rauh	BG Heidelberg	HEID 130019	Brazil, Minas Gerais, Grão Mogol	W. Rauh	HEID 602161	MT047526		BRC150
Dyckia ferox Mez	BG Heidelberg	HEID 130029	donor: Les Cèdres, 1985-10-00	W. Rauh	HEID 602989	MT047495		BRC028
Ursulaea tuitensis (Magaña & E.J. Lott) R.W. Read & H.U. Baensch	BG Heidelberg	HEID 130069	Mexico, State of Jalisco, near El Tuito, near the route, 150 m	H.G. Noller	FR-0035515	MT038619		BE455
Deuterocohnia haumanii A.Cast.	BG Heidelberg	HEID 130119	Argentina, Salta, near Salta	W. Rauh	HEID 602034	MT047530		BRC167
Deuterocohnia recurvipetala E.Gross	BG Heidelberg	HEID 130120	Argentina, Córdoba, Tulumba, Reserva Cultural y Natural Cerro Colorado	W. Rauh	HEID 602075	MT047529		BRC166
Tillandsia propagulifera Rauh	BG Heidelberg	HEID 130131	Peru, Ingenio-Bagua, bei Bagua	W. Rauh		MT038762		BRC276
Tillandsia huarazensis Ehlers & W.Till	BG Heidelberg	HEID 130147	Peru, Amazonas, Chachapoyas, Balsas	W. Rauh	HEID 603634	MT038844		BRC289
Aechmea moorei H.Luther	BG Heidelberg	HEID 130154	Colombia	W. Rauh	HEID 602781	MT038469		BE444
Hechtia guatemalensis Mez	BG Heidelberg	HEID 130174	Guatemala, Zacapa, Sierra de las Minas, E-Werk bei Banaluga, Tal des Rio Hondo	W. Rauh		MN954674		BRC089
Hechtia glomerata Zuccharini	BG Heidelberg	HEID 130213	Honduras, between Tegucicalpa & Choluteca	W. Rauh		MT047485		BRC158
Aechmea chlorophylla L.B.Smith	BG Heidelberg	HEID 130239	Brazil, Bahia, near Itabuna	W. Rauh	FR-0035868	MT038527		BE468
Aechmea allenii L.B.Smith	BG Heidelberg	HEID 130248	Panama, El Cope	W. Rauh		MT038682		BE434
Aechmea angustifolia Poeppig & Endlicher	BG Heidelberg	HEID 130249	Peru	W. Rauh	FR-0035380	MT038468		BE437
Aechmea abbreviata L.B.Smith	BG Heidelberg	HEID 130260	Ecuador, Cuyabeno River, Laguna Grande	W. Rauh	HEID 602635	MT038467		BE433
Aechmea contracta (Martius ex Schultes f.) Baker	BG Heidelberg	HEID 130265	old garden stock with unknown origin		FR-0103075	MT038470		BE474
Aechmea nudicaulis (L.) Griseb.	BG Heidelberg	HEID 130266	Panama, Panamá, Cerro Jefe	W. Rauh		MT047494		BRC429
Aechmea nudicaulis (L.) Griseb.	BG Heidelberg	HEID 130271	Peru	W. Rauh		MT047493		BRC428
Aechmea nudicaulis (L.) Griseb.	BG Heidelberg	HEID 130294	Panama	W. Rauh		MT047490		BRC392
Aechmea tonduzii Mez & Pittier ex Mez	BG Heidelberg	HEID 130295	Panama	W. Rauh	HEID 602554	MT038680		BE427
Guzmania musaica (Linden & André) Mez	BG Heidelberg	HEID 130325	Panama	W. Rauh		MT038776		BRC134
Aechmea nudicaulis (L.) Griseb.	BG Heidelberg	HEID 130330	Honduras	W. Rauh		MT047491		BRC393
Pitcairnia altensteinii (Link, Klotzsch & Otto) Lem.	BG Heidelberg	HEID 130361	Venezuela	W. Rauh	HEID 605051	MT047511		BRC111
Pitcairnia elliptica Mez & Sodiro	BG Heidelberg	HEID 130367	Peru, Junín, San Ramón	W. Rauh	HEID 603518	MT047519		BRC122
Pitcairnia nigra (Carrière) André	BG Heidelberg	HEID 130377	Ecuador, Prov. Azuay, Bergwald bei Cuenca	Strobel	HEID 603556	MT047513		BRC113
Billbergia elegans Martius ex Schultes f.	BG Heidelberg	HEID 130424	Peru, between Oxapampa & San Ramón	W. Rauh	HEID 602867	MT038557	MT026300	BE429
Guzmania rauhiana H.Luther	BG Heidelberg	HEID 130452	Ecuador			MT038803		BRC143
Tillandsia denudata André	BG Heidelberg	HEID 130466	Peru, Tarma Tarma	W. Rauh		MT038815		BRC205
Guzmania alliodora E.Gross	BG Heidelberg	HEID 130470	Peru, Huánuco Region, Leoncio Prado, Tingo Maria	W. Rauh		MT038799		BRC139
Werauhia werckleana (Mez) J.R.Grant	BG Heidelberg	HEID 130497	Guatemala, zwischen Guatemala City und El Rancho bei Albergo	W. Rauh	HEID 603993	MT038808		BRC181
Aechmea longifolia (Rudge) L.B.Smith & M.A.Spencer	BG Heidelberg	HEID 130511	French Guiana, Mont Tortue, 250–450 m	A.R.A. Görts van Rijn	FR-0083402	MT038458		BE469
Guzmania lingulata (L.) Mez	BG Heidelberg	HEID 130518	Peru	W. Rauh		MT038802		BRC142
Vriesea ochracea Rauh & E.Gross	BG Heidelberg	HEID 130556	Peru, Chanchamayo valley near Oxapampa	A. B. Lau		MT038810		BRC184
Tillandsia magnusiana Wittm.	BG Heidelberg	HEID 130612	Mexico, Oaxaca, Oaxaca-Tehuacan km24	W. Rauh		MT038860		BRC333
Pitcairnia roseoalba E.Gross & Rauh	BG Heidelberg	HEID 130624	Peru, Cajamarca, Tal von Canchaque grasige Hänge	W. Rauh	HEID 602472	MT047523		BRC136
Tillandsia caloura Harms	BG Heidelberg	HEID 130627	Ecuador, Cuenca-Giron-Sta. Isabal bis Paßhöhe km104	W. Rauh	HEID 602631	MT047476		BRC357
Tillandsia polystachia (L.) L.	BG Heidelberg	HEID 130644	Mexico, Chiapas, La Trinitaria (municipality)	W. Rauh		MT038834		BRC261
Tillandsia ferreyrae L.B.Sm.	BG Heidelberg	HEID 130700	Peru, Chachapoyas	W. Rauh		MT038761		BRC274
Tillandsia concolor L.B.Sm.	BG Heidelberg	HEID 130711	Mexico, Oaxaca-Tehuatepec, bei Totolapan km 79	W. Rauh		MT038849		BRC309
Tillandsia tricolor Schltdl. & Cham.	BG Heidelberg	HEID 130727	Mexico, Puebla, between Tehuacán & Orizaba	W. Rauh		MT038850		BRC311
Tillandsia utriculata L.	BG Heidelberg	HEID 130770	Mexico, San Luis Potosi, 50 km vor San Luis Potosi an Felswänden	W. Rauh		MT038758		BRC057
Tillandsia klausii Ehlers	BG Heidelberg	HEID 130856	Mexico, Chiapas, Presa Augostina	R. Ehlers	HEID 204998	MT038851		BRC312
Tillandsia disticha Kunth	BG Heidelberg	HEID 130862	Ecuador, Manabi, Jipijappa Küstenwald	W. Rauh	HEID 603639	MT047470		BRC448
Tillandsia ionantha Planch.	BG Heidelberg	HEID 130936	Costa Rica, Rio Grande de Tarcoles, Tal des Rio Grande de Tarcoles	C.K. Horich		MT038767		BRC404
Tillandsia disticha Kunth	BG Heidelberg	HEID 130974	Peru, Lambayeque, Cajamarca, Chiclayo-Olmos-Jean	W. Rauh		MT047464		BRC440
Tillandsia usneoides (L.) L.	BG Heidelberg	HEID 130989	Brazil, São Paulo, nahe der Stadt São Paulo, Insel Guaruya	W. Rauh		MT038720		BRC395
Tillandsia disticha Kunth	BG Heidelberg	HEID 130992	Peru, Lambayeque, Cajamarca, Chilayo-Olmos-Jean	W. Rauh		MT047466		BRC442
Wallisia lindeniana (Regel) E.Morren	BG Heidelberg	HEID 130995	Ecuador, Strecke Limon - Macas bei Mendez	W. Rauh		MT038869		BRC352
Tillandsia disticha Kunth	BG Heidelberg	HEID 131003	Ecuador, Cuenca-Giron-Machala	W. Rauh		MT047469		BRC446
Tillandsia disticha Kunth	BG Heidelberg	HEID 131022	Ecuador, zwischen Giron und Santa Isabel Pachamama	W. Rauh	HEID 603655	MT047468		BRC445
Tillandsia floribunda Kunth	BG Heidelberg	HEID 131034	Peru, La Libertad, Tal von Otuzco	W. Rauh		MT038748		BRC203
Tillandsia hitchcockiana L.B.Sm.	BG Heidelberg	HEID 131058	Peru, Lambayeque, Olmos	W. Rauh	HEID 603974	MT038846		BRC304
Tillandsia polita var. elongata	BG Heidelberg	HEID 131127	Mexico, Chiapas, Municipio Teopisca near hamlet Nuevo Belén at highway MEX-190	W. Rauh		MT038858		BRC327
Tillandsia streptophylla Scheidw. ex C.Morren	BG Heidelberg	HEID 131132	Mexico, Chiapas, Zinacantán (municipality) near Zequentic	W. Rauh	HEID 603739	MT038821		BRC226
Tillandsia ehlersiana Rauh	BG Heidelberg	HEID 131154	Mexico, Chiapas, nahe Ocozocoautla de Espinosa	R. Ehlers	HEID 204766	MT038845		BRC301
Tillandsia werneriana J.R.Grant	BG Heidelberg	HEID 131158	Peru, Lambayeque Chiclayo -Tucmochl (?)	W. Rauh		MT038871		BRC364
Tillandsia disticha Kunth	BG Heidelberg	HEID 131160	Peru, Utcubamba-Tal bei Ingenia	W. Rauh	HEID 603657	MT047465		BRC441
Tillandsia balbisiana Schult. & Schult.f.	BG Heidelberg	HEID 131228	Honduras, W von Tegucigalpa	W. Rauh		MT038856		BRC322
Tillandsia neglecta E.Pereira	BG Heidelberg	HEID 131256	Brazil, Rio de Janeiro, Cabo, Frio	W. Rauh		MT038862		BRC336
Tillandsia tenuifolia L.	BG Heidelberg	HEID 131266	Peru, nahe der Grenze zu Bolivia, Puno Sandia - San Juan del Oro	W. Rauh	HEID 603867	MT038735		BRC185
Catopsis minimiflora Matuda	BG Heidelberg	HEID 131296	Mexico, Chiapas, above Tapachula between Hacienda La Patria & San Carlos	W. Rauh		MT038813		BRC199
Tillandsia purpurea Ruiz & Pav.	BG Heidelberg	HEID 131338	unknown origin & propagation history	U.P. Tust		131338_3: MT047553, 131338_2: MT047554, 131338_1: MT047555		HEID 131338
Tillandsia friesii Mez	BG Heidelberg	HEID 131394	Argentina, Salta, Cachi Huamahuaca	W. Rauh		MT038854		BRC316
Tillandsia marconae W.Till & Vitek	BG Heidelberg	HEID 131405	Peru, Nasca, Lomas de Marcona, in the closed area of the mining company 'Hierro Perú', along the road to Campamento de belvedere	W. Till & E. Vitek	HEID 603726	131405_1: MT047546, 131405_2: MT047547, 131405_3: MT047548		HEID 131405
Tillandsia humilis C.Presl	BG Heidelberg	HEID 131417	Peru, Cajamarca, Lambayeque, Paßhöhe Cajamarca - Chiclayo	W. Rauh		MT038832		BRC258
Tillandsia aurea Mez	BG Heidelberg	HEID 131438	Peru, Chavin Maria	W. Rauh	HEID 604258	MT038757		BRC315
Tillandsia hondurensis Rauh	BG Heidelberg	HEID 131463	Honduras, Francisco Morazán, Municipio Valle de Angeles, Valle de Angeles	E. G. Kamm & W. Rauh	HEID 202442	MT038837		BRC267
Tillandsia fendleri Grisebach	BG Heidelberg	HEID 131486	Peru, bei Huanuco	W. Rauh	HEID 603669	MT038804		BRC170
Tillandsia capillaris Ruiz & Pav.	BG Heidelberg	HEID 131498	Brazil, ex hort. D. Cathicart s.n.			MT038737		BRC417
Tillandsia lajensis André	BG Heidelberg	HEID 131572	Ecuador, zwischen Quito (Prov. Pichincha) und Baeza (Prov. Napo) bei Baeza am Berg Antisana.	W. Rauh		MT038747		BRC367
Tillandsia caerulea Kunth	BG Heidelberg	HEID 131589	Peru, Chiclayo - Udima	W. Rauh		MT038865		BRC343
Tillandsia recurvata (L.) L.	BG Heidelberg	HEID 131590	Peru, Huánuco, Huánuco de Pasco, Tingo Maria	W. Rauh	HEID 603746	131590_1: MT047566, 131590_2: MT047567, 131590_3: MT047568		HEID 131590
Tillandsia capillaris Ruiz & Pav.	BG Heidelberg	HEID 131619	Peru, Lima Region, Huaura, Paccho District, valley of Churin, ca. 500 m S Campamento Mirahuay Alto	W. Rauh		MT038710		BRC298
Tillandsia capillaris Ruiz & Pav.	BG Heidelberg	HEID 131619	Peru, Lima, Huaura, Paccho District	W. Rauh		MT038729		BRC420
Tillandsia streptocarpa Baker	BG Heidelberg	HEID 131639	Brazil	A.F.H. Buining		MT047482		BRC460
Tillandsia disticha Kunth	BG Heidelberg	HEID 131661	Ecuador, Azuay, 5 km vor Cuenca	W. Rauh	HEID 201964	MT047467		BRC444
Tillandsia capillaris Ruiz & Pav.	BG Heidelberg	HEID 131664	Argentina, Cachi, Humahuaca	W. Rauh		MT038730		BRC421
Tillandsia pseudobaileyi Gardner	BG Heidelberg	HEID 131670	Mexico, Guerrero, Chilpancingo de los Bravo (municipality) ca. 2 km N Mazatlán at MEX-95	W. Rauh	HEID 604534	MT038839		BRC275
Tillandsia rudolfii E.Gross & Hase	BG Heidelberg	HEID 131678	Ecuador, Chimborazo, Colta , Parroquia Juan de Velasco, near hamlet La Libertad	A. Hirtz		MT038818		BRC215
Tillandsia capillaris Ruiz & Pav.	BG Heidelberg	HEID 131680	Bolivia, Chusquisaca, Zudanez, 20 km westlich von Zudanez	K. Ahlgrimm		MT038727		BRC415
Tillandsia baileyi Rose ex Small	BG Heidelberg	HEID 131703	USA, Texas, E from Corpus Christi	W. Rauh	HEID 603620	MT038823		BRC229
Tillandsia caliginosa W.Till	BG Heidelberg	HEID 131721	Bolivia, Potosi, Cotagaita	L. Hromadnik	HEID 603615	MT038861		BRC335
Tillandsia capillaris Ruiz & Pav.	BG Heidelberg	HEID 131739	Argentina, Salta, Valle de Cafayate	W. Rauh		MT038733		BRC424
Tillandsia virescens Ruiz & Pav.	BG Heidelberg	HEID 131739	Argentina, Salta, Valle de Cafayate	W. Rauh		MT047541		HEID 131739
Tillandsia capillaris Ruiz & Pav.	BG Heidelberg	HEID 131740	Peru, bei Huanuco	W. Rauh		MT038732		BRC423
Racinaea sinuosa (L.B.Sm.) M.A.Spencer & L.B.Sm.	BG Heidelberg	HEID 131772	Ecuador, Loja-Catacocha am Rio Catacocha	W. Rauh		MT047472		BRC178
Catopsis delicatula L.B.Sm.	BG Heidelberg	HEID 131774	Mexico, Chiapas, Zapotitlán de Vadillo (municipality)	W. Rauh	HEID 601928	MT038827		BRC243
Tillandsia purpurea Ruiz & Pav.	BG Heidelberg	HEID 131780	Peru, Tacna, Palca District	W. Rauh		131780_1: MT047556, 131780_2: MT047557, 131780_3: MT047558, 131780: MT047559		HEID 131780
Tillandsia virescens Ruiz & Pav.	BG Heidelberg	HEID 131787	old garden stock with unknown origin			131787_1: MT047533, 131787_3: MT047534, 131787_2: MT047535		HEID 131787
Tillandsia ferrisiana L.B.Sm.	BG Heidelberg	HEID 131797	Mexico, Sinaloa, bei Mazatlan	W. Rauh	HEID 607882	MT047478		BRC433
Tillandsia juncea (Ruiz & Pav.) Poir.	BG Heidelberg	HEID 131810	Mexico, Oaxaca, Santa María Teopoxco (municipality) near Los Duraznos at Highway MEX-182	W. Rauh		MT038843		BRC284
Tillandsia gardneri Lindl.	BG Heidelberg	HEID 131824	Brazil, Rio de Janerio, Cabo Frio	W. Rauh		MT038745		BRC339
Tillandsia myosura Griseb. ex Baker	BG Heidelberg	HEID 131843	Bolivia, between Sucre (Chuquisaca) & Santa Cruz de la Sierra (Santa Cruz)	L. Hromadnik		MT038842		BRC283
Tillandsia schiedeana Steud.	BG Heidelberg	HEID 131863	Mexico, Veracruz, Puente Nacional (municipality) ca. 1.5 km E Chichicaxtle	W. Rauh	HEID 202314	MT038825		BRC238
Tillandsia schiedeana Steud.	BG Heidelberg	HEID 131863	Mexico, Veracruz, Puente Nacional (municipality), ca. 1.5 km E Chichicaxtle	W. Rauh		MT038848		BRC308
Tillandsia recurvata (L.) L.	BG Heidelberg	HEID 131923	Peru, Piura, Huancabamba, "Sonderoi - Huancabamba"	W. Rauh		131923_1: MT047563, 131923_2: MT047564, 131923_3: MT047565		HEID 131923
Tillandsia albida Mez & Purpus	BG Heidelberg	HEID 131996	Mexico, Est. Hidalgo Pachuca-Los Venados-Metztitlan	W. Rauh		MT047474		BRC290
Tillandsia macbrideana L.B.Sm.	BG Heidelberg	HEID 132019	Peru, between Lima and La Oroya near Rio Blanco	W. Rauh	HEID 202494	MT038814		BRC202
Tillandsia muhriae W.Weber	BG Heidelberg	HEID 132040	Bolivia, Sucre-Tarija nach Camargo	L. Hromadnik		MT038820		BRC225
Tillandsia muhriae W.Weber	BG Heidelberg	HEID 132040	Bolivia, Sucre-Tarija nach Camargo	L. Hromadnik		MT038853		BRC314
Tillandsia cacticola L.B.Sm.	BG Heidelberg	HEID 132057	Peru, Utcubamba-Tal, Leimebamba Flußufer	W. Rauh	HEID 603574	MT038755		BRC175
Tillandsia sphaerocephala Baker	BG Heidelberg	HEID 132086	Argentina, Tucuman Tati, de Valle Rio Los Sosas	W. Rauh		MT038753		BRC286
Tillandsia xiphioides Ker Gawl.	BG Heidelberg	HEID 132290	Bolivia, Tarija, 60 km vor Villamontes	L. Hromadnik		MT047462		BRC456
Tillandsia rectangula Baker	BG Heidelberg	HEID 132303	Bolivia, Santa Cruz Muyupampa-Montragudo	L. Hromadnik		MT038826		BRC241
Tillandsia mazatlanensis Rauh	BG Heidelberg	HEID 132352	Mexico, Sinaloa, bei Mazatlan Trockenwald	W. Rauh	HEID 607722	MT038870		BRC353
Tillandsia paleacea C.Presl	BG Heidelberg	HEID 132425	Peru	W. Rauh	HEID 202198	MT038743		BRC341
Tillandsia balsasensis Rauh	BG Heidelberg	HEID 132465	Peru	W. Rauh & K. Kniže		MT038822		BRC228
Tillandsia harrisii Ehlers	BG Heidelberg	HEID 132502	Guatemala, El Arcos Tal von El Rando	W. Rauh	HEID 603689	MT038836		BRC266
Tillandsia bermejoensis H.Hrom.	BG Heidelberg	HEID 132538	Bolivia, St. Cruz, Prov. Florida, Ostabhang der Sierra de Santa Cruz am Rio Bermejo, zwischen Samaipata und Angostura	L. Hromadnik	HEID 603575	MT038739		BRC347
Tillandsia edithae Rauh	BG Heidelberg	HEID 132542	Bolivia, Santa Cruz, Samaipata-St. Cruz km 350.	W. Rauh	HEID 202198	MT038744		BRC325
Tillandsia pseudomicans Rauh	BG Heidelberg	HEID 132545	Peru, Apurimac, Tal des Rio Apurimac Andahuaylas - Abancay	W. Rauh	HEID 607772, HEID 607773	MT038754		BRC303
Mezobromelia capituligera (Griseb.) J.R.Grant	BG Heidelberg	HEID 132601	Bolivia, Cochabamba, Chapare, Carrasco National Park	T. Krömer	HEID 602441, HEID 602442	MT038879		BRC127
Pitcairnia pseudoundulata Rauh	BG Heidelberg	HEID 132642	Peru, Amazonas, b/t Milagro and Imacita	W. Rauh	HEID 602459 to HEID 602463	MT047510		BRC109
Tillandsia virescens "La Isla" Ruiz & Pav.	BG Heidelberg	HEID 8112431	Peru		HEID	811243_1: MT047538, 811243_2: MT047539, 811243_3: MT047540		HEID 811243
Fosterella windischii L.B.Sm. & Read	BG Kassel	Kranz 213 (Leme 7145)	Brazil, Mato Grosso, Serra de Ricardo Franco, Cachoeira seca	W. Kranz	RB01379178	MT047502		BRC079
Fosterella weddelliana (Brongn. ex Baker) L.B.Sm.	BG Utrecht	2010GR00666	Bolivia, Solacana		U/L	MT047498		BRC039
Brocchinia melanacra L.B.Sm.	BG Wien	B11B2-1	Venezuela		WU	MT047484		BRC090
Tillandsia espinosae L.B.Sm.	BG Wien	B12-103	Ecuador, El Oro Balsas		WU	MT038796		BRC102
Fosterella petiolata (Mez) L.B.Sm.	BG Wien	B97B369-1	ex hort. E. Leme 2414		WU0009464, WU0012993; HBV B97B369-1	MT047506		BRC096
Wittmackia polycephala (Baker) Aguirre-Santoro	BG Wien	B47/92	Jamaica, Middlesex County, St. Ann Parish 4 miles S of Show Meself Corner along the rd Claremont to Albion, 4 miles ESE of Albion	W. Till	WU0005528 bis WU0005530	MT038655		BB126
Aechmea mutica L.B.Sm.	E. Leme	Leme ???	Private collection of E. Leme (Refúgio dos Gravatás, Teresópolis, Rio de Janeiro, Brazil)	E. Leme	E. Leme Collection	MT038543		BE384
Aechmea luddemanniana Brongn. ex E.Morren	E. Leme	Leme 001	Mexico	E. Leme	RB01207267, RB01405051	MT038616	KU258027	BE040
Billbergia iridifolia (Nees & Mart.) Lindley	E. Leme	Leme 002A	Private collection of E. Leme (Refúgio dos Gravatás, Teresópolis, Rio de Janeiro, Brazil)	E. Leme	E. Leme Collection	MT038554		BE327
Cryptanthus colnagoi Rauh & Leme	E. Leme	Leme 1021	Brazil, Bahia, Potiraguá	E. Colnago	RG	MT038653		BE493
Orthophytum saxicola (Ule) L.B.Sm.	E. Leme	Leme 103A	Brazil, Bahia	E. Leme	RB	MT038640		BE642
Aechmea entringeri Leme	E. Leme	Leme 1054	Private collection of E. Leme (Refúgio dos Gravatás, Teresópolis, Rio de Janeiro, Brazil)	E. Leme	E. Leme Collection	MT038490		BE247
Aechmea bocainensis E.Pereira & Leme	E. Leme	Leme 1074	Private collection of E. Leme (Refúgio dos Gravatás, Teresópolis, Rio de Janeiro, Brazil)	E. Leme	E. Leme Collection	MT038575		BE287
Neoregelia wilsoniana M.B.Foster	E. Leme	Leme 1088	Private collection of E. Leme (Refúgio dos Gravatás, Teresópolis, Rio de Janeiro, Brazil)	E. Leme	E. Leme Collection	MT038582		BE104
Neoregelia leucophoea (Baker) L.B.Sm.	E. Leme	Leme 1107	Brazil, Rio de Janeiro, Petrápolis	E. Leme	RB; HB	MT038587	MT026327	BE121
Aechmea ramosa var. festiva Mart. ex Schult. & Schult.f.	E. Leme	Leme 1121	Private collection of E. Leme (Refúgio dos Gravatás, Teresópolis, Rio de Janeiro, Brazil)	E. Leme	E. Leme Collection	MT038499		BE574
Aechmea fosteriana subsp. rupicola Leme	E. Leme	Leme 1126	Brazil, Espírito Santo, Aracruz Estrada Aracruz-Ibiraçú	E. Leme	E. Leme Collection	MT038519		BE620
Aechmea araneosa L.B.Sm.	E. Leme	Leme 1139	Brazil	E. Leme	WU0011195, WU0011196	MT038489		BE240
Aechmea paradoxa (Leme) Leme	E. Leme	Leme 1197	Bahia, Buerarema, Alvim Seidel	E. Leme	HB	MT038484		BE196
Quesnelia testudo Lindm.	E. Leme	Leme 1217	Brazil, São Paulo, without exact place, January 1981, leg. N. da Silva 183, cult. E. Leme 1217	E. Leme	E. Leme Collection	MT038573	MT026350	BE060
Aechmea weilbachii var. weilbachii forma pendula F.Didr.	E. Leme	Leme 1292	Brazil, Rio de Janeiro, Rio de Janeiro, Parque Nacional da Serra dos Órgãos	D. Sucre	RB01415471	MT038546		BE545
Aechmea saxicola (L.B. Sm.) J.R. Maciel & G. Sousa,	E. Leme	Leme 1318	Brazil, Rio de Janeiro, Campos, Parque Estadual do Desengano, Bacia do Rio Mocotó, Fazenda São Julião, ca. 100 m	E. Leme	RB	MT038503	KU258034	BE166
Aechmea ramosa Mart. ex Schult. & Schult.f.	E. Leme	Leme 1340	Brazil, Rio de Janeiro, São Fidélis, road to Itacolomi, ca. 600 m elev., 7 September 1988, E. Leme 1340	E. Leme	E. Leme Collection	MT038479		BE047
Aechmea comata (Gaudich.) Baker	E. Leme	Leme 1366	Private collection of E. Leme (Refúgio dos Gravatás, Teresópolis, Rio de Janeiro, Brazil)	E. Leme	E. Leme Collection	MT038569		BE608
Canistropsis marceloi (E.Pereira & Moutinho) Leme	E. Leme	Leme 1370	Private collection of E. Leme (Refúgio dos Gravatás, Teresópolis, Rio de Janeiro, Brazil)	E. Leme	E. Leme Collection	MT038598	MT026303	BE183
Neoregelia lactea H.Luther & Leme	E. Leme	Leme 1371	Private collection of E. Leme (Refúgio dos Gravatás, Teresópolis, Rio de Janeiro, Brazil)	E. Leme	E. Leme Collection	MT038614		BE623
Aechmea cylindrata Lindm.	E. Leme	Leme 1432	Brazil, Santa Catarina, Piçarras, ca. 200 m from the ocean, leg. J.C. da Silva 38, October 1989, cult. E. Leme 1432	E. Leme	E. Leme Collection	MT038564		BE039
Aechmea caudata Lindm.	E. Leme	Leme 1439	Private collection of E. Leme (Refúgio dos Gravatás, Teresópolis, Rio de Janeiro, Brazil)	E. Leme	E. Leme Collection	MT038563		BB111
Aechmea leptantha (Harms) Leme & J A Siqueira	E. Leme	Leme 1453	Private collection of E. Leme (Refúgio dos Gravatás, Teresópolis, Rio de Janeiro, Brazil)	E. Leme	E. Leme Collection	MT038448		BE243
Aechmea phanerophlebia Baker	E. Leme	Leme 1472	Brazil, Minas Gerais, Lima Duarte Parque Estadual de Ibitipoca. Gruta das Bromélias	E. Leme	RB01395350	MT038669		BE168
Cryptanthus microglazioui I.Ramírez	E. Leme	Leme 152	Brazil, Espírito Santo, Domingos Martins	E. Leme	E. Leme Collection	MT038645		BE638
Quesnelia edmundoi var. edmundoi L.B.Sm.	E. Leme	Leme 1581	Private collection of E. Leme (Refúgio dos Gravatás, Teresópolis, Rio de Janeiro, Brazil)	E. Leme	E. Leme Collection	MT038520		BE622
Cryptanthus maritimus L.B.Sm.	E. Leme	Leme 1582	Brazil, Espírito Santo, Vilha Velha, Convento da Penha	E. Leme	RB	MT038654		BE634
Rokautskyia exaltata (H.Luther) Leme, S. Heller & Zizka	E. Leme	Leme 1618	Brazil, Espírito Santo, Santa Leopoldina	E. Leme	RB	MT038694		BE659
Ananas fritzmuelleri Camargo	E. Leme	Leme 1632	Brazil, Santa Catarina, Porto Belo, Mariscal, Atlantic Forest	E. Leme	RB01207298, RB01380680	MT038670	KU258040	BE178
Aechmea rubroaristata Leme & Fraga	E. Leme	Leme 1662	Brazil, Santa Catarina, Santa Catarina Próximo a divisa com o Paraná, Campo Alegre, Morro do Iquererim (Quiriri)	E. Leme	RB00595340, RB00595338, RB00595265	MT038572		BE498
Wittrockia cyathiformis (Vellozo) Leme	E. Leme	Leme 1663	Private collection of E. Leme (Refúgio dos Gravatás, Teresópolis, Rio de Janeiro, Brazil)	E. Leme	E. Leme Collection	MT038602	MT026370	BE416
Billbergia seidelii L.B.Sm. & Reitz	E. Leme	Leme 1702	Private collection of E. Leme (Refúgio dos Gravatás, Teresópolis, Rio de Janeiro, Brazil)	E. Leme	E. Leme Collection	MT038561		BE580
Aechmea purpureorosea (Hook.) Wawra	E. Leme	Leme 173	Private collection of E. Leme (Refúgio dos Gravatás, Teresópolis, Rio de Janeiro, Brazil)	E. Leme	E. Leme Collection	MT038550		BE160
Nidularium amazonicum (Baker) Linden & E.Morren ex Lindman	E. Leme	Leme 1759	Brazil, Paraná, Campina Grande do Sul, Serra Capivari, ca. 700 m elev., 26 April 1991, E. Leme 1759	E. Leme	E. Leme Collection	MT038580	MT026334	BE102
Aechmea rubrolilacina Leme	E. Leme	Leme 1784	Brazil, Espírito Santo, Domingos Martins, Alto Jucuba, leg. A. Seidel 1139, July 1991, cult E. Leme 1784, type descendant	E. Leme	RB00849752, RB00849754; MBML047733	MT038660		BE064
Cryptanthus bahianus L.B.Sm.	E. Leme	Leme 1856	Brazil, Minas Gerais, Santa Bárbara	E. Leme	RB	MT038693		BE652
Neoregelia rubrovittata Leme	E. Leme	Leme 1865	Brazil, Rio de Janeiro, Rio de Janeiro, Cachoeira de Macacu, fazenda Amaro	E. Leme	RB01405325	MT038579	MT026324	BE067
Hohenbergia edmundoi L.B.Sm. & Read	E. Leme	Leme 1866	Private collection of E. Leme (Refúgio dos Gravatás, Teresópolis, Rio de Janeiro, Brazil)	E. Leme	E. Leme Collection	MT038485	MT026309	BE222
Billbergia vittata Brongn. ex Morel	E. Leme	Leme 1920	Private collection of E. Leme (Refúgio dos Gravatás, Teresópolis, Rio de Janeiro, Brazil)	E. Leme	E. Leme Collection	MT038690		BE613
Neoregelia concentrica (Vell.) L.B.Sm.	E. Leme	Leme 1923	Private collection of E. Leme (Refúgio dos Gravatás, Teresópolis, Rio de Janeiro, Brazil)	E. Leme	E. Leme Collection	MT038583	MT026321	BE106
Aechmea eurycorymbus Harms	E. Leme	Leme 2073	Private collection of E. Leme (Refúgio dos Gravatás, Teresópolis, Rio de Janeiro, Brazil)	E. Leme	HB	MT038447	MT026347	BE176
Hohenbergia rosea L.B.Sm. & Read	E. Leme	Leme 2075	Private collection of E. Leme (Refúgio dos Gravatás, Teresópolis, Rio de Janeiro, Brazil)	E. Leme	E. Leme Collection	MT038498	MT026311	BE564
Aechmea chantinii (Carrière) Baker	E. Leme	Leme 2160	unknown origin, April 1993, cult. E. Leme 2160	E. Leme	HB	MT038463		BE041
Wittrockia gigantea (Baker) Leme	E. Leme	Leme 2166	Brazil, Minas Gerias, Fervedouro	E. Leme	E. Leme Collection	MT038596	MT026368	BE175
Aechmea filicaulis (Griseb.) Mez	E. Leme	Leme 2268	Private collection of E. Leme (Refúgio dos Gravatás, Teresópolis, Rio de Janeiro, Brazil)	E. Leme	E. Leme Collection	MT038476		BE629
Aechmea aquilega (Salisb.) Griseb.	E. Leme	Leme 2321	Brazil, Ceará, Guaramiranga, Serra do Baturité, Pico Alto, ca. 1300 m elev., 15 March 1994	E. Leme	HB	MT038445		BE101
Hohenbergia burle-marxii Leme & W.Till	E. Leme	Leme 2325	Brazil, Bahia, proximidades de Porto Seguro	E. Leme	HB; WU	MT038496		BE523
Quesnelia liboniana (De Jongle) Mez	E. Leme	Leme 2361	Brazil, Rio de Janeiro, Teresópolis Soberbo, Morro do Elefante	E. Leme	R010007239; RB01414259	MT038548	MT026355	BE071
Aechmea pectinata Baker	E. Leme	Leme 2364	Brazil, Rio de Janeiro, Teresópolis, Soberbo, Morro do Elefante, ca. 1300 m elev., 16 April 1994, E. Leme 2364 et al.	E. Leme	E. Leme Collection	MT038656		BE027
Quesnelia lateralis Wawra	E. Leme	Leme 2366	Brazil, Rio de Janeiro, Teresópolis Soberbo, Morro do Elefante	E. Leme	RB01207184	MT038549		BE094
Aechmea aff. cucullata H.Luther	E. Leme	Leme 2540	ex hort. Dennis Cathicart s.n.	E. Leme	RB01368908	MT038471		BE502
Neoregelia myrmecophila (Ule) L.B.Sm.	E. Leme	Leme 2555	Private collection of E. Leme (Refúgio dos Gravatás, Teresópolis, Rio de Janeiro, Brazil)	E. Leme	E. Leme Collection	MT038453	MT026318	BE587
Neoregelia wurdackiiL.B.Sm.	E. Leme	Leme 2567	Private collection of E. Leme (Refúgio dos Gravatás, Teresópolis, Rio de Janeiro, Brazil)	E. Leme	E. Leme Collection	MT038454		BE597
Neoregelia dungsiana E.Pereira	E. Leme	Leme 2663	Private collection of E. Leme (Refúgio dos Gravatás, Teresópolis, Rio de Janeiro, Brazil)	E. Leme	E. Leme Collection	MT038593	MT026322	BE137
Aechmea weilbachii var. albipetala F.Didr.	E. Leme	Leme 2679	Private collection of E. Leme (Refúgio dos Gravatás, Teresópolis, Rio de Janeiro, Brazil)	E. Leme	E. Leme Collection	MT038544		BE540
Cryptanthus fernseeoides (Leme) Leme, S. Heller & Zizka	E. Leme	Leme 2724	Brazil, Espírito Santo, Domingos Martins	E. Leme	HB	MT038695		BE660
Neoregelia margarethae	E. Leme	Leme 2748	Private collection of E. Leme (Refúgio dos Gravatás, Teresópolis, Rio de Janeiro, Brazil)	E. Leme	E. Leme Collection	MT038452		BE131
Aechmea abbreviata L.B.Sm.	E. Leme	Leme 2823	Private collection of E. Leme (Refúgio dos Gravatás, Teresópolis, Rio de Janeiro, Brazil)	E. Leme	E. Leme Collection	MT038473		BE538
Aechmea hoppii (Harms) L.B.Sm.	E. Leme	Leme 2839	Private collection of E. Leme (Refúgio dos Gravatás, Teresópolis, Rio de Janeiro, Brazil)	E. Leme	E. Leme Collection	MT038459		BE531
Aechmea lingulata (L.) Mez	E. Leme	Leme 2860	Private collection of E. Leme (Refúgio dos Gravatás, Teresópolis, Rio de Janeiro, Brazil)	E. Leme	E. Leme Collection	MT038623	MT026360	BE156
Neoregelia tenebrosa Leme	E. Leme	Leme 2866	Private collection of E. Leme (Refúgio dos Gravatás, Teresópolis, Rio de Janeiro, Brazil)	E. Leme	E. Leme Collection	MT038610	MT026331	BE578
Edmundoa ambigua (Wand. & Leme) Leme	E. Leme	Leme 2935A	Brazil, Rio de Janeiro, Parati, Sertãozinho, km 158 rd BR 101, Rio-Santos	E. Leme	WU0010418, WU0010419	MT038605	MT026305	BE482
Nidularium fulgens Lem.	E. Leme	Leme 2940	Private collection of E. Leme (Refúgio dos Gravatás, Teresópolis, Rio de Janeiro, Brazil)	E. Leme	HB	MT038586	MT026335	BE118
Edmundoa perplexa (L.B.Sm.) Leme	E. Leme	Leme 2956	Brazil, São Paulo, rd Caraguatatuba-Taubaté, Alto da Serra	J.C. da Silva	RB	MT038578		BB125
Aechmea gurkeniana Pereira & Moutinho	E. Leme	Leme 298	Brazil, Bahia, Caravelas, leg. L.C. Gurken, type descendant, cult. E. Leme 298	E. Leme	E. Leme Collection	MT038514		BE087
Aechmea echinata (Leme) Leme	E. Leme	Leme 2996	Brazil, Bahia, Uruçuca Estrada Serra Grande-Itacaré	E. Leme	RB01207207	MT038483		BE186
Aechmea fraseri (Baker) Aguirre-Santoro	E. Leme	Leme 3007 (3077)	Private collection of E. Leme (Refúgio dos Gravatás, Teresópolis, Rio de Janeiro, Brazil)	E. Leme	E. Leme Collection	MT038631	MT026357	BE408
Aechmea capitata (Schultes & Schultes f.) Baker	E. Leme	Leme 3041	Brazil, Bahia, Una estr. São José a Una, Km 9	E. Leme	RB00583688	MT038482	MT026307	BE147
Portea nana Leme & H.Luther	E. Leme	Leme 3044	Brazil, Bahia, Una, road São José-Una, km 9, 500-600 m elev., 7 April 1995, E. Leme 3044 et al.	E. Leme	HB		MT026341	BE092
Billbergia horrida Regel	E. Leme	Leme 3054	Private collection of E. Leme (Refúgio dos Gravatás, Teresópolis, Rio de Janeiro, Brazil)	E. Leme	E. Leme Collection	MT038562	MT026299	BE584
Aechmea racinae L.B.Sm.	E. Leme	Leme 3088	Private collection of E. Leme (Refúgio dos Gravatás, Teresópolis, Rio de Janeiro, Brazil)	E. Leme	E. Leme Collection	MT038531		BE198
Neoregelia pineliana (Lem.) L.B.Sm.	E. Leme	Leme 3108	Brazil, Espírito Santo, Domingos Martins, Alto de santa Maria	E. Leme	E. Leme Collection	MT038606	MT026332	BE488
Canistropsis exigua (E.Pereira & Leme) Leme	E. Leme	Leme 3175	Brazil, São Paulo Maresias São Sebastião	E. Leme	RB00369119	MT038584	MT026304	BE109
Aechmea tessmanii Harms	E. Leme	Leme 3223	Equador, without exact place, leg. Girko 90, August 1995, clt. E. Leme 3223	E. Leme	E. Leme Collection	MT038464		BE044
Aechmea tonduzii (Mez & Pittier ex Mez) Aguirre-Santoro	E. Leme	Leme 3226	Private collection of E. Leme (Refúgio dos Gravatás, Teresópolis, Rio de Janeiro, Brazil)	E. Leme	E. Leme Collection	MT038672		BE246
Aechmea tayoensis Gilmartin	E. Leme	Leme 3240	Ecuador	E. Leme	RB01380678	MT038673	KU258036	BE264
Aechmea roeseliae H.Luther	E. Leme	Leme 3264	Private collection of E. Leme (Refúgio dos Gravatás, Teresópolis, Rio de Janeiro, Brazil)	E. Leme	E. Leme Collection	MT038466		BE402
Canistrum fosterianum L.B.Sm.	E. Leme	Leme 3289	Brazil, Bahia, Guaibiom, S. Linhares s.n., October 1995, cult. E. Leme 3289	E. Leme	RB	MT038662		BE077
Neoregelia nivea Leme	E. Leme	Leme 3299	Private collection of E. Leme (Refúgio dos Gravatás, Teresópolis, Rio de Janeiro, Brazil)	E. Leme	E. Leme Collection	MT038590	MT026319	BE133
Aechmea meeana (L.B.Sm.) L.B.Sm.	E. Leme	Leme 3357	Private collection of E. Leme (Refúgio dos Gravatás, Teresópolis, Rio de Janeiro, Brazil)	E. Leme	E. Leme Collection	MT038687		BE497
Aechmea sphaerocephala Baker	E. Leme	Leme 3395	Private collection of E. Leme (Refúgio dos Gravatás, Teresópolis, Rio de Janeiro, Brazil)	E. Leme	E. Leme Collection	MT038505		BE503
Aechmea flavorosea E.Pereira	E. Leme	Leme 3397	Private collection of E. Leme (Refúgio dos Gravatás, Teresópolis, Rio de Janeiro, Brazil)	E. Leme	E. Leme Collection	MT038553		BE318
Aechmea disjuncta (L B Smith) Leme & J A Siqueira	E. Leme	Leme 343	Private collection of E. Leme (Refúgio dos Gravatás, Teresópolis, Rio de Janeiro, Brazil)	E. Leme	E. Leme Collection	MT038517		BE511
Aechmea marginalis Leme & J.A.Siqueira	E. Leme	Leme 3463	Private collection of E. Leme (Refúgio dos Gravatás, Teresópolis, Rio de Janeiro, Brazil)	E. Leme	E. Leme Collection	MT038676		BE344
Quesnelia humilis Mez	E. Leme	Leme 3473	Brazil, São Paulo	E. Leme	RB00648352	MT038565	MT026354	BE065
Neoregelia lymaniana R.Braga & Sucre	E. Leme	Leme 3501	Private collection of E. Leme (Refúgio dos Gravatás, Teresópolis, Rio de Janeiro, Brazil)	E. Leme	E. Leme Collection	MT038615		BE624
Aechmea mira Leme & H.Luther	E. Leme	Leme 3722	Brazil, Bahia, Guaibim Terrestre, formando grandes touceiras na restinga arbórea	E. Leme	RB00557707; HB	MT038666		BE154
Aechmea leonard-kentiana H.Luther & Leme	E. Leme	Leme 3735	Brazil, Bahia, Una Estrada Olivença-Una	E. Leme	RB01397202	MT038678		BE409
Wittmackia incompta (Leme & H.Luther) Aguirre-Santoro	E. Leme	Leme 3746	Private collection of E. Leme (Refúgio dos Gravatás, Teresópolis, Rio de Janeiro, Brazil)	E. Leme		MT038627	MT026365	BE386
Neoregelia nevaresii Leme & H.Luther	E. Leme	Leme 3775	Private collection of E. Leme (Refúgio dos Gravatás, Teresópolis, Rio de Janeiro, Brazil)	E. Leme	E. Leme Collection	MT038599	MT026323	BE194
Cryptanthus diamantinensis Leme	E. Leme	Leme 3813	Brazil, Bahia, Chapada Diamantina, Caeté-Açu, Riparian Forest in Campos Rupestres	R. Oliveira	WU0011920	MT038652		BE491
Sincoraea burle-marxii (L.B.Sm. & Read) Louzada & Wand.	E. Leme	Leme 3821	Brazil, Bahia, Chapada Diamantina	E. Leme	RB	MT038647		BE640
Cryptanthus dianae Leme	E. Leme	Leme 3872	Brazil, Pernambuco, Mata do Camocim	E. Leme	UFP	MT038696		BE661
Hohenbergiopsis guatemalensis (L.B.Sm.) L.B.Sm. & Read	E. Leme	Leme 3901	Private collection of E. Leme (Refúgio dos Gravatás, Teresópolis, Rio de Janeiro, Brazil)	E. Leme	E. Leme Collection	MT038621		BE570
Aechmea paniculata Ruiz & Pav.	E. Leme	Leme 3907	Private collection of E. Leme (Refúgio dos Gravatás, Teresópolis, Rio de Janeiro, Brazil)	E. Leme	E. Leme Collection	MT038475		BE591
Aechmea victoriana L.B.Sm.	E. Leme	Leme 4	Private collection of E. Leme (Refúgio dos Gravatás, Teresópolis, Rio de Janeiro, Brazil)	E. Leme	E. Leme Collection	MT038534		BE220
Canistrum seidelianum W.Weber	E. Leme	Leme 4009	Brazil, Bahia, road Camacã-Pau Brasil, ca. 200 m elev., August 1997, leg. P.Nahoum s.n., cult. E. Leme 4009	E. Leme	E. Leme Collection	MT038663		BE086
Aechmea discordiae Leme	E. Leme	Leme 4012	Bahia, Bahia, km 36 road Santo André-Belmonte, August 1997, leg.P. Nahoum s.n., cult. E. Leme 4012	E. Leme	HB	MT038444	MT026346	BE091
Aechmea disjuncta (L B Smith) Leme & J A Siqueira	E. Leme	Leme 4013	Private collection of E. Leme (Refúgio dos Gravatás, Teresópolis, Rio de Janeiro, Brazil)	E. Leme	E. Leme Collection	MT038516		BE507
Aechmea egleriana L.B.Sm.	E. Leme	Leme 4159	Private collection of E. Leme (Refúgio dos Gravatás, Teresópolis, Rio de Janeiro, Brazil)	E. Leme	E. Leme Collection	MT038461		BE403
Aechmea floribunda Mart. ex Schult. & Schult.f.	E. Leme	Leme 4182	Brazil, Rio de Janeiro, São Pedro da Aldeia, Balneária São Pedro, near sea level, 15 January 1998, E. Leme 4182	E. Leme	E. Leme Collection	MT038478		BE034
Aechmea patentissima (Mart. ex Schult. & Schult.f.) Mez	E. Leme	Leme 4315	Private collection of E. Leme (Refúgio dos Gravatás, Teresópolis, Rio de Janeiro, Brazil)	E. Leme	E. Leme Collection	MT038624	MT026359	BE158
Canistrum sandrae Leme	E. Leme	Leme 4341	Brazil, Bahia, Jaguaripe, road Aratuípe-Camassandi, ca. 100 m elev., 24 July 1998, E. Leme 4341 et al.	E. Leme	E. Leme Collection	MT038480		BE076
Canistrum guzmanioides Leme	E. Leme	Leme 4374	Brazil, Bahia, Wenceslay Guimarãeis, nova Esperança, Est. Ecol. Nova Esperança, ca. 800 m elev., 25 July 1998, E. Leme 4374 et al., paratype descendant	E. Leme	E. Leme Collection	MT038481		BE081
Aechmea amorimii Leme	E. Leme	Leme 4376	Brazil, Bahia, Wenceslau Guimarães Nova Esperança, Est. Ecológica de Nova Esperança, morro atrás da sede	E. Leme	RB01397278, RB01207270	MT038628	MT026364	BE392
Aechmea triticina Mez	E. Leme	Leme 4435	Brazil, Rio de Janeiro, Paulo de Frontin, Sacra FamIlia do Tingua, Quinta de Santa Matilde	E. Leme	R; HB	MT038577		BE400
Edmundoa lindenii (Regel) Leme	E. Leme	Leme 4446	Private collection of E. Leme (Refúgio dos Gravatás, Teresópolis, Rio de Janeiro, Brazil)	E. Leme	E. Leme Collection	MT038592		BE136
Nidularium innocentii Lem.	E. Leme	Leme 4457	Private collection of E. Leme (Refúgio dos Gravatás, Teresópolis, Rio de Janeiro, Brazil)	E. Leme	E. Leme Collection	MT038612		BE607
Neoregelia eleutheropetala (Ule) L.B.Sm.	E. Leme	Leme 4491	Private collection of E. Leme (Refúgio dos Gravatás, Teresópolis, Rio de Janeiro, Brazil)	E. Leme	E. Leme Collection	MT038455	MT026320	BE627
Ananas ananassoides (Baker) L.B.Sm.	E. Leme	Leme 4559	Brazil, Bahia	E. Leme	E. Leme Collection	KU659082	KU659084	BE500
Lymania spiculata Leme & Forzza	E. Leme	Leme 4638	Brazil, Bahia, JuAari	E. Leme	HB	MT038532		BE209
Canistrum lanigerum H.H.Luther & Leme	E. Leme	Leme 4664	Private collection of E. Leme (Refúgio dos Gravatás, Teresópolis, Rio de Janeiro, Brazil)	E. Leme	E. Leme Collection	MT038501		BE611
Wittrockia superba Lindm.	E. Leme	Leme 4751	Private collection of E. Leme (Refúgio dos Gravatás, Teresópolis, Rio de Janeiro, Brazil)	E. Leme	HB	MT038581	MT026369	BE103
Aechmea bruggeri Leme	E. Leme	Leme 4765	Brazil, São Paulo, Juquitiba, Alto da serra	E. Leme	RB01397239	MT038526		BE410
Acanthostachys pitcairnioides (Mez) Rauh & Barthlott	E. Leme	Leme 483	Brazil, Espírito Santo, Domingos Martins, Mata Roberto Kautsky	E. Leme	RB	KU095880	KU258017	BE214
Aechmea nidularioides L.B.Sm.	E. Leme	Leme 4841	Equador, without exact place, leg. K. Green s.n, April 2000, cult. E. Leme 4841	E. Leme	E. Leme Collection	MT038456		BE046
Aechmea gigantea Baker (non Baker, (65) 1889)	E. Leme	Leme 4844	Private collection of E. Leme (Refúgio dos Gravatás, Teresópolis, Rio de Janeiro, Brazil)	E. Leme	E. Leme Collection	MT038668		BE165
Billbergia nana Pereira	E. Leme	Leme 4879	Private collection of E. Leme (Refúgio dos Gravatás, Teresópolis, Rio de Janeiro, Brazil)	E. Leme	E. Leme Collection	MT038555	MT026301	BE376
Hoplocryptanthus schwackeanus (Mez) Leme, S. Heller & Zizka	E. Leme	Leme 4912	Brazil, Minas Gerais, Morro do Pilar	E. Leme	RB	MT038649		BE651
Hohenbergia conquistensis Leme	E. Leme	Leme 4980	Private collection of E. Leme (Refúgio dos Gravatás, Teresópolis, Rio de Janeiro, Brazil)	E. Leme	E. Leme Collection	MT038488		BE235
Aechmea guainumbiorum J.A.Siqueira & Leme	E. Leme	Leme 4997	Brazil, Pernambuco, Maraial, Engenho Cortume, Atlantic Forest	E. Leme	UFP	MT038443	MT026348	BE090
Canistrum alagoanum Leme & J.A.Siqueira	E. Leme	Leme 5000	Brazil, Alagoas, Maceió, ca. 10 km from the city, November 2000, leg. A. Frassy s.n., cult. E. Leme 5000	E. Leme	E. Leme Collection	MT038441	MT026344	BE073
Canistrum aurantiacum E.Morren	E. Leme	Leme 5028	Brazil, Pernambuco, Serra do Quengo, Usina Frei Caneca (colônia)	E. Leme	RB01207180	MT038451	MT026343	BE481
Hohenbergia pennae Pereira	E. Leme	Leme 503	Private collection of E. Leme (Refúgio dos Gravatás, Teresópolis, Rio de Janeiro, Brazil)	E. Leme	E. Leme Collection	MT038492		BE357
Aechmea gustavoi J.A.Siqueira & Leme	E. Leme	Leme 5031	Brazil, Pernambuco, Serra do Quengo, Usina Frei Caneca (colônia)	E. Leme	RB01207226	MT038502	KU258025	BE033
Canistrum aurantiacum E.Morren	E. Leme	Leme 5036	Brazil, Pernambuco, Jaqueira, Serra do Quengo, Usina Frei Caneca, 700 m elev., 17 November 2000, E. Leme 5036 et al.	E. Leme	E. Leme Collection	MT038440		BE070
Aechmea fulgens Brongn.	E. Leme	Leme 5043	Private collection of E. Leme (Refúgio dos Gravatás, Teresópolis, Rio de Janeiro, Brazil)	E. Leme	HB	MT038530	KU258024	BE152
Orthophytum vagans M.B.Foster	E. Leme	Leme 505	Brazil	E. Leme	RB	MT038641		BE492
Aechmea atrovittata Leme & Siqueira	E. Leme	Leme 5089	Private collection of E. Leme (Refúgio dos Gravatás, Teresópolis, Rio de Janeiro, Brazil)	E. Leme	E. Leme Collection	MT038510		BB107
Ronnbergia silvana (Leme) Aguirre-Santoro	E. Leme	Leme 5131	Private collection of E. Leme (Refúgio dos Gravatás, Teresópolis, Rio de Janeiro, Brazil)	E. Leme	HB	MT038691		BE636
Wittmackia tentaculifera (Leme, Amorim & J.A.Siqueira) Aguirre-Santoro	E. Leme	Leme 5155	Private collection of E. Leme (Refúgio dos Gravatás, Teresópolis, Rio de Janeiro, Brazil)	E. Leme	HB	MT038636	MT026358	BE521
Portea filifera L.B.Sm.	E. Leme	Leme 5157	Private collection of E. Leme (Refúgio dos Gravatás, Teresópolis, Rio de Janeiro, Brazil)	E. Leme	HB	MT038435		BE413
Portea filifera L.B.Sm.	E. Leme	Leme 5157	Brazil, Bahia, without exact place, April 2001, leg. E. Silva s.n., cult. E. Leme 5157	E. Leme	HB		MT026345	BE088
Rokautskyia roberto-kautskyi (Leme) Leme, S. Heller & Zizka	E. Leme	Leme 5210	Brazil, Espírito Santo, Domingos Martins	E. Leme	HB 73798	MT038644		BE621
Rokautskyia odoratissima (Leme) Leme, S. Heller & Zizka	E. Leme	Leme 5216	Brazil, Espírito Santo, Santa Leopoldina	E. Leme	HB 73797	MT038646		BE654
Rokautskyia pseudoscaposa (L.B.Sm.) Leme, S. Heller & Zizka	E. Leme	Leme 5217	Brazil, Espírito Santo, Domingos Martins	E. Leme	RB	MT038697		BE662
Hoplocryptanthus tiradentesensis (Leme) Leme, S. Heller & Zizka	E. Leme	Leme 5240	Brazil, Minas Gerais, Tiradentes	E. Leme	RB	MT038698		BE664
Eduandrea selloana (Baker) Leme, W.Till, G.K.Brown, J.R.Grant & Govaerts	E. Leme	Leme 5261	Brazil, Minas Gerais, Santa Barbara, Parque Natural do Caraça, Bocaina	E. Leme	HB	MT038607		BE489
Aechmea turbinocalyx (Mez) Aguirre-Santoro	E. Leme	Leme 5273	Private collection of E. Leme (Refúgio dos Gravatás, Teresópolis, Rio de Janeiro, Brazil)	E. Leme	E. Leme Collection	MT038630	MT026367	BE401
Ronnbergia silvana Leme	E. Leme	Leme 5305	Brazil, Bahia, Nova Cana Serra da Boa Vista (Oricana)	E. Leme	CEPEC00107893	MT038671		BE231
Aechmea alopecurus Mez	E. Leme	Leme 5312	Private collection of E. Leme (Refúgio dos Gravatás, Teresópolis, Rio de Janeiro, Brazil)	E. Leme	WU0009542, WU0009604	MT038667		BE155
Aechmea depressa (L.B. Sm.) J.R. Maciel & G. Sousa	E. Leme	Leme 5317	Brazil, Bahia, Itapetinga, entrance to Potiraguá, road to Palmares	E. Leme	HB	MT038504	KU258021	BE270
Aechmea muricata (Arruda da Camara) L.B.Sm.	E. Leme	Leme 5318	Private collection of E. Leme (Refúgio dos Gravatás, Teresópolis, Rio de Janeiro, Brazil)	E. Leme	E. Leme Collection	MT038525		BE343
Aechmea bahiana L.B.Sm.	E. Leme	Leme 5342	Brazil, Bahia, Rio de Contas, road Fazendola-Kaiambola, ca. 1200 m, 18 August 2001, E. Leme 5342 et al.	E. Leme	HB	MT038657		BE052
Cottendorfia florida Schult. & Schult.f.	E. Leme	Leme 5384 (5351)	Private collection of E. Leme (Refúgio dos Gravatás, Teresópolis, Rio de Janeiro, Brazil)	E. Leme	E. Leme Collection	MT047483		BRC025
Androlepis fragrans Leme & H.Luther	E. Leme	Leme 5451	Private collection of E. Leme (Refúgio dos Gravatás, Teresópolis, Rio de Janeiro, Brazil)	E. Leme	E. Leme Collection	MT038622		BE606
Aechmea patriciae H.Luther	E. Leme	Leme 5460	Private collection of E. Leme (Refúgio dos Gravatás, Teresópolis, Rio de Janeiro, Brazil)	E. Leme	E. Leme Collection	MT038472		BE516
Aechmea weilbachii Didr.	E. Leme	Leme 552	Brazil, Rio de Janeiro, Rio de Janeiro, Divisa entre os Municípios de Magé e Cachoeira de Macacú	E. Leme	RB00632001	MT038545		BE542
Portea grandiflora Philcox	E. Leme	Leme 5613	Private collection of E. Leme (Refúgio dos Gravatás, Teresópolis, Rio de Janeiro, Brazil)	E. Leme	HB	MT038434		BE184
Quesnelia conquistensis Leme	E. Leme	Leme 5667	Brazil, Bahia, Vitória da Conquista	E. Leme	RB00768487	MT038574	MT026352	BE072
Edmundoa lindenii (Regel) Leme	E. Leme	Leme 5732	Private collection of E. Leme (Refúgio dos Gravatás, Teresópolis, Rio de Janeiro, Brazil)	E. Leme	E. Leme Collection	MT038601		BE360
Neoregelia compacta (Mez) L.B.Sm.	E. Leme	Leme 5748	Private collection of E. Leme (Refúgio dos Gravatás, Teresópolis, Rio de Janeiro, Brazil)	E. Leme	E. Leme Collection	MT038591	MT026326	BE134
Aechmea carvalhoi E.Pereira & Leme	E. Leme	Leme 579	Brazil, Bahia	E. Leme	RFA	MT038538		BE566
Aechmea hellae (Salisb.) Griseb.	E. Leme	Leme 5893	Private collection of E. Leme (Refúgio dos Gravatás, Teresópolis, Rio de Janeiro, Brazil)	E. Leme	HB	MT038446		BE135
Orthophytum zanonii Leme	E. Leme	Leme 5941	Brazil, Espírito Santo, Pancas	E. Leme	HB	MT038642		BE644
Lapanthus itambensis (Versieux & Leme) Louzada & Versieux	E. Leme	Leme 5977	Brazil, Minas Gerais, Santo Antonio do Itambé	E. Leme	RB	MT038651		BE633
Canistrum auratum Leme	E. Leme	Leme 6011	Brazil, Bahia, Barra do Choça, ca. 900 m elev., 26 September 2003, E. Leme 6011 et al.	E. Leme	E. Leme Collection	MT038658		BE061
Aechmea disjuncta (L B Smith) Leme & J A Siqueira	E. Leme	Leme 6043	Brazil, Bahia, Itororó, near Rio do Meio, 300 m elev., 27 September 2003, E. Leme 6043 et al.	E. Leme	E. Leme Collection	MT038512		BE056
Aechmea catendensis J.A.Siqueira & Leme	E. Leme	Leme 6072	Brazil, Alagoas, Usina Serra Grande, Mata do Coimbra, October 2003, leg. A.V. A. Neto s.n., cult. E. Leme 6072, paratype descendant	E. Leme	HB	MT038439		BE069
Aechmea marauensis Leme	E. Leme	Leme 6074	Private collection of E. Leme (Refúgio dos Gravatás, Teresópolis, Rio de Janeiro, Brazil)	E. Leme	E. Leme Collection	MT038677		BE391
Aechmea cephaloides J.A.Siqueira & Leme	E. Leme	Leme 6099	Brazil, Pernambuco, Jaqueira, Serra do Urubu, RPPN Frei Caneca, December 2003, leg. J.A.Siqueira Filho 939, cult. E. Leme 6099, type descendant	E. Leme	HB	MT038442	MT026342	BE082
Cryptanthus burle-marxii Leme	E. Leme	Leme 6193	Brazil, Pernambuco, Ipojuca, Mata do Cupe	E. Leme	RB	MT038699		BE665
Canistrum improcerum Leme & J.A.Siqueira	E. Leme	Leme 6211	Brazil, Alagoas, between Paripuera and São Luis do Quitunde, 27 March 2004, J. S. de Medeiros et al., cult. E. Leme 6211, type descendant	Elton Leme	HB	MT038659		BE062
Canistropsis correia-araujoi (E.Pereira & Leme) Leme	E. Leme	Leme 625	Private collection of E. Leme (Refúgio dos Gravatás, Teresópolis, Rio de Janeiro, Brazil)	E. Leme	E. Leme Collection	MT038674		BE302
Aechmea longifolia (Rudge) L.B.Sm. & M.A.Spencer	E. Leme	Leme 6275	Private collection of E. Leme (Refúgio dos Gravatás, Teresópolis, Rio de Janeiro, Brazil)	E. Leme	E. Leme Collection	MT038460		BE546
Aechmea mertensii (G.Mey.) Schult. & Schult.f.	E. Leme	Leme 6288	Brazil, Pará, Santa Isabel do Pará Caraparu	E. Leme	RB01387146	MT038465		BE048
Wittrockia cyathiformis (Vell.) Leme	E. Leme	Leme 6411	Brazil, São Paulo, rd Piedade-Tapiraí, to Chachoeira do Chá, Tapiraí	E. Leme	E. Leme Collection	MT038588		BE126
Hohenbergia stellata Schult. & Schult.f.	E. Leme	Leme 6494	Private collection of E. Leme (Refúgio dos Gravatás, Teresópolis, Rio de Janeiro, Brazil)	E. Leme	E. Leme Collection	MT038487	MT026306	BE233
Aechmea costantinii (Mez) L.B.Sm.	E. Leme	Leme 6596	Brazil, Alagoas, Murici, Res. Ecol. Murici, Mata da Bananeira, Pedra do Bonito, 522 m elev., 17 March 2005	E. Leme	E. Leme Collection	MT038438	MT026339	BE058
Araeococcus chlorocarpus (Wawra) Leme & J A Siqueira	E. Leme	Leme 6600	Private collection of E. Leme (Refúgio dos Gravatás, Teresópolis, Rio de Janeiro, Brazil)	E. Leme	E. Leme Collection	MT038507		BE257
Aechmea pernambucentris J.A.Siqueira & Leme	E. Leme	Leme 6610	Brazil, Alagoas Murici Res. Ecol. Murici. Mata da Bananeira	E. Leme	RB01207252	MT038629	MT026363	BE398
Aechmea froesii (L.B.Sm.) Aguirre-Santoro	E. Leme	Leme 6614	Private collection of E. Leme (Refúgio dos Gravatás, Teresópolis, Rio de Janeiro, Brazil)	E. Leme	E. Leme Collection	MT038626	MT026366	BE331
Ananas parguazensis Camargo & L.B.Sm.	E. Leme	Leme 6651	Brazil, Amapá, proximity of the city Macapá	E. Leme	RB	MT038686	KU258042	BE495
Neoglaziovia variegata (Arruda) Mez	E. Leme	Leme 6677	Brazil, Pernambuco, Bodocó	E. Leme	E. Leme Collection	MT038639	MT026316	BE618
Aechmea serragrandensis Leme & J A Siqueira	E. Leme	Leme 6679	Private collection of E. Leme (Refúgio dos Gravatás, Teresópolis, Rio de Janeiro, Brazil)	E. Leme	E. Leme Collection	MT038506		BE515
Rokautskyia sanctaluciae (Leme & L. Kollmann) Leme, S. Heller & Zizka	E. Leme	Leme 6699	Brazil, Espírito Santo, Santa Teresa	E. Leme	MBML	MT038700		BE667
Orthophytum duartei L.B.Sm.	E. Leme	Leme 6703	Brazil, Espírito Santo	E. Leme	RB	MT038702		BE677
Aechmea bambusoides L.B.Sm. & Reitz	E. Leme	Leme 672	Brazil, Minas Gerais, rd BR 116, near Carangola	E. Leme	RB00109217, RB01207243	MT038513		BE074
Aechmea sulbahianensis Leme, Amorim & J.A. Siqueira	E. Leme	Leme 6734	Brazil, Bahia, Uruçuca Água Preta, estrada da Uruçuca Serra Grande, estrada secundária à direita para a Fazenda São José	E. Leme	RB01207253	MT038625		BE250
Lymania languida Leme	E. Leme	Leme 6735	Private collection of E. Leme (Refúgio dos Gravatás, Teresópolis, Rio de Janeiro, Brazil)	E. Leme	E. Leme Collection	MT038540	MT026315	BE628
Quesnelia koltesii Amorim & Leme	E. Leme	Leme 6743	Private collection of E. Leme (Refúgio dos Gravatás, Teresópolis, Rio de Janeiro, Brazil)	E. Leme	E. Leme Collection	MT038541	MT026353	BE112
Aechmea triangularis L.B.Sm.	E. Leme	Leme 6745	Brazil, Minas Gerais, Governador Valadares, ca. 50 km from the city, Goiabal, Tronqueira River, 600 m elev., November 2005, R. Vasconcelos s.n., Cult. E. Leme 6745	E. Leme	E. Leme Collection	MT038522		BE080
Aechmea sucreana Martinelli & C.Vieira	E. Leme	Leme 6785	Brazil, Espírito Santo, Linhares, Res. Florestal da Vale, Dec. 2005, leg. B.R. Silva 1396, cult. E. Leme 6785	E. Leme	HB	MT038661		BE068
Aechmea chrysocoma Baker	E. Leme	Leme 6815	Private collection of E. Leme (Refúgio dos Gravatás, Teresópolis, Rio de Janeiro, Brazil)	E. Leme	HB	MT038437	MT026319	BB113
Ananas ananassoides (Baker) L.B.Sm.	E. Leme	Leme 6858	Brazil, Mato Grosso, Poxoréu, Cerrado	E. Leme	RB	MT038689		BE501
Aechmea capixabae L.B.Sm.	E. Leme	Leme 6948	Brazil, Espírito Santo, Santa Teresa Reserva Ecológica Santa Lúcia. Trilha a esquerda a partir do túmulo de A. Ruschi	E. Leme	RB01379277	MT038536		BE381
Billbergia elegans Thunb.	E. Leme	Leme 6980	Private collection of E. Leme (Refúgio dos Gravatás, Teresópolis, Rio de Janeiro, Brazil)	E. Leme	E. Leme Collection	MT038556		BE377
Quesnelia clavata Amorim & Leme	E. Leme	Leme 7009	Brazil, Bahia, Sao José da Vitória, Serra de Sao José	E. Leme	HB	MT038542		BE292
Aechmea polyantha E.Pereira & Reitz	E. Leme	Leme 7015	Private collection of E. Leme (Refúgio dos Gravatás, Teresópolis, Rio de Janeiro, Brazil)	E. Leme	E. Leme Collection	MT038462		BE552
Neoregelia rothinessa Leme, H.Luther & W.Till	E. Leme	Leme 7062	Brazil, Bahia, Iguai, near the border with Dario Meira, Serra dos Indios, nascente do Rio dos Indios, Alfredo Pinheiro farm	E. Leme	RB	MT038608	MT026328	BE558
Ananas ananassoides (Baker) L.B.Sm.	E. Leme	Leme 7140	Brazil, Mato Grosso, Brasnorte	E. Leme	RB	KU095894	KU258037	BE210
Hoplocryptanthus caracensis (Leme & E. Gross) Leme, S. Heller & Zizka	E. Leme	Leme 7230	Brazil, Minas Gerais, Itabirito	E. Leme	RB	MT038648		BE641
Aechmea candida E.Morren ex Baker	E. Leme	Leme 7337	Private collection of E. Leme (Refúgio dos Gravatás, Teresópolis, Rio de Janeiro, Brazil)	E. Leme	E. Leme Collection	MT038570		BE610
Orthophytum pseudovagans Leme & L.Kollmann	E. Leme	Leme 7348	Brazil, Espírito Santo, Águia Branca	E. Leme	RB	MT038703		BE680
Aechmea phanerophlebia Baker	E. Leme	Leme 7350	Private collection of E. Leme (Refúgio dos Gravatás, Teresópolis, Rio de Janeiro, Brazil)	E. Leme	E. Leme Collection	MT038576		BE374
Aechmea pineliana (Brongn. ex Planch.) Baker	E. Leme	Leme 74	Private collection of E. Leme (Refúgio dos Gravatás, Teresópolis, Rio de Janeiro, Brazil)	E. Leme	E. Leme Collection	MT038523		BE148
Alcantarea duarteana (L.B.Sm.) J.R.Grant	E. Leme	Leme 7474	Brazil, Minas Gerias, Diamantina, road Conselheiro Mata 1317	E. Leme et al.	E. Leme Collection	MT038780		BRC060
Neoregelia cruenta (R.Graham) L.B.Sm.	E. Leme	Leme 7532	Brazil, Rio de Janeiro, Campos dos Goytacazes Morro do Itaoca	E. Leme	RB00767080	MT038595	MT026317	BE172
Aechmea nudicaulis (L.) Griseb.	E. Leme	Leme 7533	Private collection of E. Leme (Refúgio dos Gravatás, Teresópolis, Rio de Janeiro, Brazil)	E. Leme	E. Leme Collection	MT038566		BE174
Aechmea coelestis (K.Koch) E.Morren	E. Leme	Leme 7557	Private collection of E. Leme (Refúgio dos Gravatás, Teresópolis, Rio de Janeiro, Brazil)	E. Leme	E. Leme Collection	MT038571		BE614
Quesnelia kautskyi C.Vieira	E. Leme	Leme 7564	Private collection of E. Leme (Refúgio dos Gravatás, Teresópolis, Rio de Janeiro, Brazil)	E. Leme	E. Leme Collection	MT038560		BE533
Lapanthus vidaliorum (O.B.C. Ribeiro & C.C. Paula) Leme, S. Heller & Zizka	E. Leme	Leme 7607	Brazil, Minas Gerais, Santa Bárbara	E. Leme	HB	MT038705		BE685
Lapanthus vidaliorum (O.B.C. Ribeiro & C.C. Paula) Leme, S. Heller & Zizka	E. Leme	Leme 7607	Brazil, Minas Gerais, Santa Bárbara	E. Leme	HB	MT038692		BE650
Hoplocryptanthus lavrasensis (Leme) Leme, S. Heller & Zizka	E. Leme	Leme 7620	Brazil, Minas Gerais, Santa Bárbara	E. Leme	RB	MT038701		BE669
Quesnelia edmundoi var. Rubrobracteata L.B.Sm.	E. Leme	Leme 7634	Private collection of E. Leme (Refúgio dos Gravatás, Teresópolis, Rio de Janeiro, Brazil)	E. Leme	E. Leme Collection	MT038521		BE630
Aechmea amicorum B.R. Silva & H. Luther	E. Leme	Leme 7669	Brazil, Bahia, Porto Seguro Trancoso, Praia de Pitimirim, ca. 500 m da ponte de Itaquena.	E. Leme	RB01375480	MT038449		BE249
Aechmea roberto-seidelii E.Pereira	E. Leme	Leme 7747	Private collection of E. Leme (Refúgio dos Gravatás, Teresópolis, Rio de Janeiro, Brazil)	E. Leme	E. Leme Collection	MT038529		BE559
Aechmea guaratingensis Leme & L.Kollmann	E. Leme	Leme 7767	Brazil, Bahia, Guaratinga, São João do Sul. Fazenda Estrela do Sul	E. Leme	RB00768610, RB00768329, RB00768611; MBML040178	MT038665		BE141
Neoregelia retrorsa Leme & L.Kollmann	E. Leme	Leme 7792	Private collection of E. Leme (Refúgio dos Gravatás, Teresópolis, Rio de Janeiro, Brazil)	E. Leme	E. Leme Collection	MT038609	MT026325	BE563
Portea fosteriana L.B.Sm.	E. Leme	Leme 7809	Brazil, Espírito Santo Vargem Alta Mono de Sal	E. Leme	RB01395434	MT038436	MT026337	BE419
Aechmea roberto-seidelii E.Pereira	E. Leme	Leme 7831	Private collection of E. Leme (Refúgio dos Gravatás, Teresópolis, Rio de Janeiro, Brazil)	E. Leme	E. Leme Collection	MT038528		BE526
Nidularium purpureum Beer	E. Leme	Leme 784	Brazil, Rio de Janeiro, Rio de Janeiro, Parque Nacional da Tijucxa	E. Leme	RB00647040	MT038585	MT026333	BE115
Canistropsis billbergioides (Schult.f.) Leme	E. Leme	Leme 7860	Private collection of E. Leme (Refúgio dos Gravatás, Teresópolis, Rio de Janeiro, Brazil)	E. Leme	E. Leme Collection	MT038597	MT026302	BE180
Neoglaziovia burle-marxii Leme	E. Leme	Leme 7900	Leme 7900 Private Herbarium	E. Leme	E. Leme Collection	MT038638	KJ580028	BE276
Ananas bracteatus (Lindl.) Schult.f.	E. Leme	Leme 7933	Brazil, Minas Gerais, Ladainha, Pedra da ladainha	E. Leme	E. Leme Collection	MT038688		BE499
Neoregelia pascoaliana L.B.Sm.	E. Leme	Leme 8012	Private collection of E. Leme (Refúgio dos Gravatás, Teresópolis, Rio de Janeiro, Brazil)	E. Leme	E. Leme Collection	MT038611	MT026329	BE583
Quesnelia edmundoi var. rubrobracteata L.B.Sm.	E. Leme	Leme 8075	Brazil, Rio de Janeiro, Santa Maria Madalena, Barra do Imbé toward Sossego do Imbé, 60 m elev., 17 October 2009, E. Leme 8075 et al.	E. Leme	E. Leme Collection	MT038511	MT026351	BE049
Aechmea ramosa Mart. ex Schult. & Schult.f.	E. Leme	Leme 8094	Private collection of E. Leme (Refúgio dos Gravatás, Teresópolis, Rio de Janeiro, Brazil)	E. Leme	E. Leme Collection	MT038500		BE575
Billbergia distachia (Vell.) Mez	E. Leme	Leme 8129	Private collection of E. Leme (Refúgio dos Gravatás, Teresópolis, Rio de Janeiro, Brazil)	E. Leme	E. Leme Collection	MT038552		BE234
Aechmea marauensis Leme	E. Leme	Leme 815	Brazil, Bahia, Bahia, proximo de Maraú	E. Leme	RB00562276, RB00287179	MT038664		BE127
Aechmea aiuruocensis Leme	E. Leme	Leme 8151	Private collection of E. Leme (Refúgio dos Gravatás, Teresópolis, Rio de Janeiro, Brazil)	E. Leme	E. Leme Collection	MT038675		BE342
Aechmea nudicaulis (L.) Griseb.	E. Leme	Leme 8186	Brazil, Minas Gerais, Santa Maria do Salto Próx. divisa Bahia, Talismã, RPPN Fazenda Duas Barras, mata atlântica em frente a sede	E. Leme	RB01369352	MT038567	KU258031	BE279
Hohenbergia loredanoana Leme & L.Kollmann	E. Leme	Leme 8193	Brazil, Minas Gerais, Santa Maria do Salto Próximo a divisa com a Bahia, distrito de Talisma, RPPN Fazenda Duas Barras divisa com o Parque Estadual do Alto Cariri	E. Leme	RB00778607, RB00778780, RB00778782, RB00778781	MT038486	MT026312	BE229
Quesnelia tubifolia Leme & L.Kollmann	E. Leme	Leme 8210	Brazil, Minas Gerais, Santa Maria do Salto Near the border with Bahia, Santa Maria do Salto, Talismã, RPPN Fazenda Duas Barras, border of the Alto Cariri State Park	E. Leme	RB00850726, RB01397248	MT038518	MT026349	BE582
Neoregelia viridovinosa Leme & L.Kollmann	E. Leme	Leme 8231	Brazil, Minas Gerais, Santa Maria do Salto Próximo à divisa Bahia, P.E. Alto Cariri, Faz. Flozimo Teixeira	E. Leme	RB01369355	MT038613		BE616
Neoregelia longisepala E.Pereira & I.A.Penna	E. Leme	Leme 830	Private collection of E. Leme (Refúgio dos Gravatás, Teresópolis, Rio de Janeiro, Brazil)	E. Leme	E. Leme Collection	MT038547		BE586
Forzzaea leopoldo-horstii (Rauh)) Leme, S. Heller & Zizka	E. Leme	Leme 8418	Brazil, Minas Gerais, Gouveia	E. Leme	RB	MT038706		BE691
Lapanthus duartei (L.B.Sm.) Louzada & Versieux	E. Leme	Leme 8439	Brazil, Minas Gerais, Conceição do Mato Dentro Serra do Cipó, MG 010, ca. 8 km da cidade	E. Leme	RB01207232	MT038650		BE632
Lymania brachycaulis (E.Morren ex Baker) L.F.Sousa	E. Leme	Leme 8496	Private collection of E. Leme (Refúgio dos Gravatás, Teresópolis, Rio de Janeiro, Brazil)	E. Leme	E. Leme Collection	MT038539	MT026314	BE590
Hohenbergia humilis L.B.Sm. & Read	E. Leme	Leme 8501	Private collection of E. Leme (Refúgio dos Gravatás, Teresópolis, Rio de Janeiro, Brazil)	E. Leme	E. Leme Collection	MT038497	MT026308	BE556
Hohenbergia belemii L.B.Sm. & Read	E. Leme	Leme 8502	Private collection of E. Leme (Refúgio dos Gravatás, Teresópolis, Rio de Janeiro, Brazil)	E. Leme	E. Leme Collection	MT038494	MT026313	BE382
Hohenbergia stellata Schult. & Schult.f.	E. Leme	Leme 8504	Brazil, Bahia, Igrapiúna, Fazenda Michelin. Mata da Vila 5, Margem direita do Rio Serinhaém	E. Leme	RB01395308	MT038493		BE358
Lymania smithii Read	E. Leme	Leme 8505	Private collection of E. Leme (Refúgio dos Gravatás, Teresópolis, Rio de Janeiro, Brazil)	E. Leme	E. Leme Collection	MT038533		BE218
Lymania globosa Leme	E. Leme	Leme 8526	Brazil, Bahia, Igrapiúna, Fazenda Michelin, Mata Luiz Inácio	E. Leme	RB01207258	MT038535		BE320
Araeococcus sessiliflorus Leme & J A Siqueira	E. Leme	Leme 8529	Private collection of E. Leme (Refúgio dos Gravatás, Teresópolis, Rio de Janeiro, Brazil)	E. Leme	E. Leme Collection	MT038508		BE293
Aechmea blanchetiana (Baker) L.B.Sm.	E. Leme	Leme 8537	Brazil, Bahia, Ituberá, Praia de Pratigi	E. Leme	RB01395321	MT038450	MT026340	BE393
Aechmea ituberaensis (Leme & L.Kollmann) Aguirre-Santoro	E. Leme	Leme 8542	Private collection of E. Leme (Refúgio dos Gravatás, Teresópolis, Rio de Janeiro, Brazil)	E. Leme	E. Leme Collection	MT038637	MT026362	BE548
Aechmea tillandsioides (Mart. ex Schult.f.) Baker	E. Leme	Leme 863	Private collection of E. Leme (Refúgio dos Gravatás, Teresópolis, Rio de Janeiro, Brazil)	E. Leme	E. Leme Collection	MT038474		BE547
Orthophytum vasconcelosianum Leme	E. Leme	Leme 8700	Brazil, Minas Gerais, Alvarenga	E. Leme	RB	MT038643		BE684
Araeococcus parviflorus (Mart. ex Schult.f.) Lindm.	E. Leme	Leme 8751	Private collection of E. Leme (Refúgio dos Gravatás, Teresópolis, Rio de Janeiro, Brazil)	E. Leme	E. Leme Collection	MT038509	MT026296	BE645
Orthophytum roseolilacinum Leme	E. Leme	Leme 8885	Brazil, Minas Gerais, Conselheiro Pena	E. Leme	RB	MT038704		BE683
Orthophytum duartei L.B. Sm.	E. Leme	Leme 8919	Brazil, Espírito Santo, Santa Teresa	E. Leme	RB01207284, RB01207234	MT038707		BE692
Orthophytum roseolilacinum Leme	E. Leme	Leme 8922	Brazil, Minas Gerais, Alvarenga	E. Leme	RB	MT038708		BE693
Neoregelia bragarum (E.Pereira & L.B.Sm.) Leme	E. Leme	Leme 911	Private collection of E. Leme (Refúgio dos Gravatás, Teresópolis, Rio de Janeiro, Brazil)	E. Leme	HB	MT038594		BE144
Aechmea fasciata (Lindl.) Baker	E. Leme	Leme 920	Private collection of E. Leme (Refúgio dos Gravatás, Teresópolis, Rio de Janeiro, Brazil)	E. Leme	HB	MT038551		BE167
Nidularium marigoi Leme	E. Leme	Leme 937	Brazil, Rio de Janeiro, Itatiaia, próximo a divisa c/ Minas Gerais, Parque Nacional do Itatiaia	E. Leme	RB00239233	MT038600		BE197
Nidularium innocentii Lem.	E. Leme	Leme 985	Private collection of E. Leme (Refúgio dos Gravatás, Teresópolis, Rio de Janeiro, Brazil)	E. Leme	E. Leme Collection	MT038589		BE130
Aechmea lilacinantha Leme	E. Leme	Leme 997	Brazil, Rio de Janeiro, Petrópolis, Estrada Rocio to Pati do Alferes, Mata do Fação	E. Leme	RB01397232, RB00557870, RB00562507	MT038524		BE245
Hohenbergia augusta (Vell.) E.Morren	E. Leme	Leme HAXX	Private collection of E. Leme (Refúgio dos Gravatás, Teresópolis, Rio de Janeiro, Brazil)	E. Leme	E. Leme Collection	MT038491		BE319
Wittmackia lingulatoides (Leme & H.Luther) Aguirre-Santoro	E. Leme	Leme s.n.	Brazil, Bahia	E. Leme	HB	MT038632		BE415
Aechmea weberi (E.Pereira & Leme) Leme	E. Leme	Leme X4	Private collection of E. Leme (Refúgio dos Gravatás, Teresópolis, Rio de Janeiro, Brazil)	E. Leme	E. Leme Collection	MT038495		BE505
Hohenbergia catingae Ule	E. Leme	Louzada 100	Private collection of E. Leme (Refúgio dos Gravatás, Teresópolis, Rio de Janeiro, Brazil)	E. Leme	E. Leme Collection	MT038477	MT026310	BB056
Brewcaria reflexa (L.B.Sm.) B.Holst	Givnish et al. 2011 [2]				Givnish et al. 2011 [2]	MT047486		BRC376
Navia saxicola L.B. Smith	Givnish et al. 2011 [2]				Givnish et al. 2011 [2]	MT047488		BRC378
Sequencia serrata (L.B.Sm.) Givnish	Givnish et al. 2011 [2]				Givnish et al. 2011 [2]	MT047487		BRC377
Guzmania rhonhofiana Diels	Palmengarten, Frankfurt am Main	FRP J149-01-104-68				MT038774		BRC049
Guzmania wittmackii (André) André ex Mez	Palmengarten, Frankfurt am Main	FRP 10700		Prinsler		MT038775		BRC050
Catopsis floribunda (Brongn.) L.B.Sm.	Palmengarten, Frankfurt am Main	FRP 10753	Mexico, Straße nach Oaxaca	W. Rauh		MT038789		BRC042
Goudaea ospinae (H.Luther) W.Till & Barfuss	Palmengarten, Frankfurt am Main	FRP 12306		G. Zizka		MT038793		BRC061
Guzmania monostachia (L.) Rusby ex Mez	Palmengarten, Frankfurt am Main	FRP 17793		E. Gouda	FR	MT038791		BRC048
Lutheria splendens (Brongn.) Barfuss & W.Till	Palmengarten, Frankfurt am Main	FRP 18260	French Guiana, Mt. De Kaw	J. Moonen	U/L	MT038795		BRC063
Vriesea neoglutinosa Mez	Palmengarten, Frankfurt am Main	FRP 18316		Gölz		MT038794		BRC062
Pitcairnia heterophylla (Lindl.) Beer	Palmengarten, Frankfurt am Main	FRP 18376	Guatemala, El Progreso	Radtke & Moldehauer		MT047497		BRC033
Catopsis floribunda (Brongn.) L.B.Sm.	Palmengarten, Frankfurt am Main	FRP 2846	Mexico, Straße nach Oaxaca	W. Rauh	FR-0035396, FR-0035471	MT038788		BRC041
Puya chilensis Molina	Senckenberg Research Institute, Frankfurt am Main	FIS00072	Chile, V. Region, Vina del Mar, Jardin Bot	G. Zizka	FR-0085246	MT047580		GZ72
Puya coerulea coerulea Lindley	Senckenberg Research Institute, Frankfurt am Main	FIS00089	Chile, V. Region	G. Zizka	FR-0085231	MT047586		GZ89
Puya coerulea coerulea Lindley	Senckenberg Research Institute, Frankfurt am Main	FIS00092	Chile, V. Region	G. Zizka	FR-0085234	MT047587		GZ92
Puya chilensis Molina	Senckenberg Research Institute, Frankfurt am Main	FIS00173	Chile, V. Region, Zapallar, Küstenstraße E-30-F kurz hinter Zapallar Richtung Papudo	G. Zizka	FR-0028944	MT047581		GZ173
Puya venusta Phil.	Senckenberg Research Institute, Frankfurt am Main	FIS00185	Chile, IV. Region, Pichidangui, Panamericana nach Los Vilos, ca 300m hinter der Peaje Pichidangui	G. Zizka	FR-0085238	MT047588		GZ185
Puya gilmartinii G.S.Varad. & A.R.Flores	Senckenberg Research Institute, Frankfurt am Main	FIS00191	Chile, IV. Region, Chungungo, Straße von Chungungo zur Mine El Tolfo, ca. 5km von Chungungo entfernt	G. Zizka	FR-0085240	MT047584		GZ191
Puya alpestris (Poepp.) Gay	Senckenberg Research Institute, Frankfurt am Main	FIS00197	Chile, IV. Region, PN Fray Jorge	G. Zizka	FR-0085298	MT047583		GZ197
Puya chilensis Molina	Senckenberg Research Institute, Frankfurt am Main	FIS00205	Chile, IV. Region, Los Vilos, Panamericana Los Vilos nach Vina del Mar, kurz hinter Los Vilos	G. Zizka	FR-0028957	MT047582		GZ205
Puya boliviensis Baker	Senckenberg Research Institute, Frankfurt am Main	FIS00220	Chile, II. Region, Paposo, Quebrada Peralita	G. Zizka	FR-0028980	MT047585		GZ220
Puya hromadnikii Rauh	Senckenberg Research Institute, Frankfurt am Main	FIS00310	ex Städtische Sukkulentensammlung Zürich	R. Horres	HEID 602095	MT047589		GZ310

## Sheet: Downloaded from GenBank
ACCESSION	DEFINITION
JX649231	Acanthostachys pitcairnioides isolate H151 maturase K (matK) gene, partial cds; chloroplast
KU258017	Acanthostachys pitcairnioides maturase K (matK) gene, complete cds; chloroplast
KU762858	Acanthostachys pitcairnioides voucher Leme s.n (SEL) trnK gene, partial sequence; and maturase K (matK) gene, complete cds; chloroplast
JX649232	Aechmea alba isolate K23819 maturase K (matK) gene, partial cds; chloroplast
KU762745	Aechmea allenii voucher Aguirre-Santoro 702 (SEL) trnK gene, partial sequence; and maturase K (matK) gene, complete cds; chloroplast
KU762837	Aechmea allenii voucher Aguirre-Santoro 713 (RMH) trnK gene, partial sequence; and maturase K (matK) gene, complete cds; chloroplast
KU762751	Aechmea allenii voucher Aguirre-Santoro 1502 (SEL) trnK gene, partial sequence; and maturase K (matK) gene, complete cds; chloroplast
KU762870	Aechmea amorimii voucher Aguirre-Santoro 722 (RMH) trnK gene, partial sequence; and maturase K (matK) gene, complete cds; chloroplast
KU762871	Aechmea amorimii voucher Monteiro 479 (RB) trnK gene, partial sequence; and maturase K (matK) gene, complete cds; chloroplast
KU762756	Aechmea andersoniana voucher Aguirre-Santoro 703 (RMH) trnK gene, partial sequence; and maturase K (matK) gene, complete cds; chloroplast
KU762874	Aechmea andersoniana voucher Monteiro 489 (RB) trnK gene, partial sequence; and maturase K (matK) gene, complete cds; chloroplast
JN202203	Aechmea aquilega maturase K (matK) gene, partial cds; chloroplast
JX649233	Aechmea bambusoides isolate BB102 maturase K (matK) gene, partial cds; chloroplast
KU762753	Aechmea caesia voucher MSBG 1986-0293A (Living specimen) trnK gene, partial sequence; and maturase K (matK) gene, complete cds; chloroplast
AY950042	Aechmea chantinii isolate K4 tRNA-Lys (trnK) gene, partial sequence; and maturase K (matK) gene, complete cds; chloroplast
JN202215	Aechmea coelestis maturase K (matK) gene, partial cds; chloroplast
KU762859	Aechmea contracta voucher MSBG 1975-0013-012A (Living specimen) trnK gene, partial sequence; and maturase K (matK) gene, complete cds; chloroplast
KU762754	Aechmea dealbata voucher MSBG 1975-0009-100A, HBG 35632 (Living specimen) trnK gene, partial sequence; and maturase K (matK) gene, complete cds; chloroplast
KU258021	Aechmea depressa maturase K (matK) gene, complete cds; chloroplast
KU258023	Aechmea distichantha maturase K (matK) gene, complete cds; chloroplast
JN202220	Aechmea distichantha maturase K (matK) gene, partial cds; chloroplast
JN202221	Aechmea distichantha maturase K (matK) gene, partial cds; chloroplast
AY950041	Aechmea distichantha var. glaziovii isolate H008 tRNA-Lys (trnK) gene, partial sequence; and maturase K (matK) gene, complete cds; chloroplast
AY950043	Aechmea drakeana isolate H042 tRNA-Lys (trnK) gene, partial sequence; and maturase K (matK) gene, complete cds; chloroplast
KU762887	Aechmea drakeana voucher MSBG 1991-0031 (Living specimen) trnK gene, partial sequence; and maturase K (matK) gene, complete cds; chloroplast
KU762752	Aechmea fasciata voucher NYBG 979/97E (Living specimen) trnK gene, partial sequence; and maturase K (matK) gene, complete cds; chloroplast
AY950036	Aechmea filicaulis isolate H248 tRNA-Lys (trnK) gene, partial sequence; and maturase K (matK) gene, complete cds; chloroplast
KU762888	Aechmea fosteriana voucher NYBG 661/64B (Living specimen) trnK gene, partial sequence; and maturase K (matK) gene, complete cds; chloroplast
KU762823	Aechmea fraseri voucher Aguirre-Santoro 724 (SEL) trnK gene, partial sequence; and maturase K (matK) gene, complete cds; chloroplast
KU762758	Aechmea froesii voucher Aguirre-Santoro 711 (SEL) trnK gene, partial sequence; and maturase K (matK) gene, complete cds; chloroplast
KU762768	Aechmea froesii voucher Monteiro 448 (RB) trnK gene, partial sequence; and maturase K (matK) gene, complete cds; chloroplast
KU258024	Aechmea fulgens maturase K (matK) gene, complete cds; chloroplast
AY950038	Aechmea gracilis isolate H043 tRNA-Lys (trnK) gene, partial sequence; and maturase K (matK) gene, complete cds; chloroplast
KU762857	Aechmea gracilis voucher Luther s.n. (SEL) trnK gene, partial sequence; and maturase K (matK) gene, complete cds; chloroplast
JX649235	Aechmea guainumbiorum isolate BB099 maturase K (matK) gene, partial cds; chloroplast
KU258025	Aechmea gustavoi maturase K (matK) gene, complete cds; chloroplast
KU762851	Aechmea gustavoi voucher Leme 4652 (HB) trnK gene, partial sequence; and maturase K (matK) gene, complete cds; chloroplast
KU762763	Aechmea incompta voucher Leme 904-TYPE (HB) trnK gene, partial sequence; and maturase K (matK) gene, complete cds; chloroplast
KU762865	Aechmea incompta voucher Leme 2937 (SEL) trnK gene, partial sequence; and maturase K (matK) gene, complete cds; chloroplast
KU762760	Aechmea ituberaensis voucher Luther s.n. (SEL) trnK gene, partial sequence; and maturase K (matK) gene, complete cds; chloroplast
JX649236	Aechmea leptantha isolate H239 maturase K (matK) gene, partial cds; chloroplast
JN202223	Aechmea lingulata maturase K (matK) gene, partial cds; chloroplast
JN202224	Aechmea lingulata maturase K (matK) gene, partial cds; chloroplast
KU762876	Aechmea lingulata voucher Smith, A.C. 10474 (GH) trnK gene, partial sequence; and maturase K (matK) gene, complete cds; chloroplast
KU258027	Aechmea lueddemanniana maturase K (matK) gene, complete cds; chloroplast
KU762879	Aechmea lueddemanniana voucher MSBG 1997-0147A (Living specimen) trnK gene, partial sequence; and maturase K (matK) gene, complete cds; chloroplast
AY950035	Aechmea mertensii isolate H044 tRNA-Lys (trnK) gene, partial sequence; and maturase K (matK) gene, complete cds; chloroplast
KU762855	Aechmea mertensii voucher MSBG 1998-0125A (Living specimen) trnK gene, partial sequence; and maturase K (matK) gene, complete cds; chloroplast
AY950028	Aechmea mexicana isolate H256 tRNA-Lys (trnK) gene, partial sequence; and maturase K (matK) gene, complete cds; chloroplast
KU258030	Aechmea muricata maturase K (matK) gene, complete cds; chloroplast
KU762867	Aechmea nidularioides voucher MSBG 1991-0526A (Living specimen) trnK gene, partial sequence; and maturase K (matK) gene, complete cds; chloroplast
KU258031	Aechmea nudicaulis maturase K (matK) gene, complete cds; chloroplast
JN202226	Aechmea nudicaulis maturase K (matK) gene, partial cds; chloroplast
AY614024	Aechmea nudicaulis var. nudicaulis MB-118 tRNA-Lys (trnK) gene, partial sequence; and maturase K (matK) gene, complete cds; chloroplast
KU762860	Aechmea nudicaulis voucher Aguirre-Santoro 717 (SEL) trnK gene, partial sequence; and maturase K (matK) gene, complete cds; chloroplast
KU762861	Aechmea nudicaulis voucher Aguirre-Santoro 719 (SEL) trnK gene, partial sequence; and maturase K (matK) gene, complete cds; chloroplast
JX649237	Aechmea paniculata isolate B001 maturase K (matK) gene, partial cds; chloroplast
KU258032	Aechmea paniculata maturase K (matK) gene, complete cds; chloroplast
KU762873	Aechmea patentissima voucher Leme 6509 (Living specimen) trnK gene, partial sequence; and maturase K (matK) gene, complete cds; chloroplast
KU762765	Aechmea patentissima voucher Leme 7531 (Living specimen) trnK gene, partial sequence; and maturase K (matK) gene, complete cds; chloroplast
KU762868	Aechmea patriciae voucher MSBG 1999-0090A (Living specimen) trnK gene, partial sequence; and maturase K (matK) gene, complete cds; chloroplast
KU762800	Aechmea penduliflora voucher MSBG 1995-0431A (Living specimen) trnK gene, partial sequence; and maturase K (matK) gene, complete cds; chloroplast
KU762779	Aechmea pernambucentris voucher Leme 6610 (HB) trnK gene, partial sequence; and maturase K (matK) gene, complete cds; chloroplast
JN202227	Aechmea phanerophlebia maturase K (matK) gene, partial cds; chloroplast
JN202229	Aechmea phanerophlebia maturase K (matK) gene, partial cds; chloroplast
AY950030	Aechmea racinae isolate H257 tRNA-Lys (trnK) gene, partial sequence; and maturase K (matK) gene, complete cds; chloroplast
JF295089	Aechmea racinae maturase K (matK) gene, partial cds; chloroplast
JN202230	Aechmea ramosa maturase K (matK) gene, partial cds; chloroplast
JN202231	Aechmea ramosa maturase K (matK) gene, partial cds; chloroplast
KU762810	Aechmea roeseliae voucher MSBG 1995-0444A (Living specimen) trnK gene, partial sequence; and maturase K (matK) gene, complete cds; chloroplast
KU258034	Aechmea saxicola maturase K (matK) gene, complete cds; chloroplast
KU762850	Aechmea saxicola voucher Luther 1115 (SEL) trnK gene, partial sequence; and maturase K (matK) gene, complete cds; chloroplast
KU762767	Aechmea sulbahianensis voucher Aguirre-Santoro 701 (SEL) trnK gene, partial sequence; and maturase K (matK) gene, complete cds; chloroplast
KU762774	Aechmea sulbahianensis voucher Monteiro 470 (RB) trnK gene, partial sequence; and maturase K (matK) gene, complete cds; chloroplast
KU258036	Aechmea tayoensis maturase K (matK) gene, complete cds; chloroplast
KU762761	Aechmea tentaculifera voucher Monteiro 463 (RB) trnK gene, partial sequence; and maturase K (matK) gene, complete cds; chloroplast
KU762744	Aechmea tonduzii voucher Aguirre-Santoro 725 (SEL) trnK gene, partial sequence; and maturase K (matK) gene, complete cds; chloroplast
KU762836	Aechmea tonduzii voucher MSBG 1987-0115A (Living specimen) trnK gene, partial sequence; and maturase K (matK) gene, complete cds; chloroplast
KU762835	Aechmea tonduzii voucher MSBG 2003-0378A (Living specimen) trnK gene, partial sequence; and maturase K (matK) gene, complete cds; chloroplast
KU762822	Aechmea triangularis voucher NYBG 538/94A (Living specimen) trnK gene, partial sequence; and maturase K (matK) gene, complete cds; chloroplast
KU762772	Aechmea turbinocalyx voucher Aguirre-Santoro 700 (SEL) trnK gene, partial sequence; and maturase K (matK) gene, complete cds; chloroplast
KU762773	Aechmea turbinocalyx voucher Monteiro 453 (RB) trnK gene, partial sequence; and maturase K (matK) gene, complete cds; chloroplast
AY950032	Aechmea warasii isolate H185 tRNA-Lys (trnK) gene, partial sequence; and maturase K (matK) gene, complete cds; chloroplast
AY614031	Alcantarea duarteana MB-59 tRNA-Lys (trnK) gene, partial sequence; and maturase K (matK) gene, complete cds; chloroplast
matK	Alignment of 481 sequences
JX649229	Ananas ananassoides isolate R111 maturase K (matK) gene, complete cds; chloroplast
AF162227	Ananas ananassoides maturase K (matK) gene, complete cds; chloroplast
KU659084	Ananas ananassoides maturase K (matK) gene, complete cds; chloroplast
KU659085	Ananas ananassoides maturase K (matK) gene, complete cds; chloroplast
JX649241	Ananas bracteatus isolate R106 maturase K (matK) gene, complete cds; chloroplast
KU258038	Ananas bracteatus maturase K (matK) gene, complete cds; chloroplast
AY950055	Ananas comosus isolate H136 tRNA-Lys (trnK) gene, partial sequence; and maturase K (matK) gene, complete cds; chloroplast
FJ968177	Ananas comosus isolate R127 maturase K (matK) gene, partial cds; chloroplast
KU258039	Ananas comosus maturase K (matK) gene, complete cds; chloroplast
KU258042	Ananas comosus var. parguazensis maturase K (matK) gene, partial cds; chloroplast
KU762814	Ananas comosus voucher Holst 6244 (SEL) trnK gene, partial sequence; and maturase K (matK) gene, complete cds; chloroplast
EU780844	Ananas fritzmuelleri isolate KEW 23823 tRNA-Lys (trnK) gene, partial sequence; and maturase K (matK) gene, complete cds; chloroplast
JX649242	Ananas fritzmuelleri isolate R105 maturase K (matK) gene, complete cds; chloroplast
KU258040	Ananas fritzmuelleri maturase K (matK) gene, complete cds; chloroplast
FJ968172	Ananas nanus isolate B482 maturase K (matK) gene, partial cds; chloroplast
AY950054	Ananas nanus isolate H040 tRNA-Lys (trnK) gene, partial sequence; and maturase K (matK) gene, complete cds; chloroplast
KU258041	Ananas nanus maturase K (matK) gene, complete cds; chloroplast
KU762815	Ananas nanus voucher MSBG 1197-1 foster (Living specimen) trnK gene, partial sequence; and maturase K (matK) gene, complete cds; chloroplast
KU762841	Billbergia elegans voucher MSBG 1993-0034A, UCBG 72.0464 (Living specimen) trnK gene, partial sequence; and maturase K (matK) gene, complete cds; chloroplast
JN202237	Billbergia euphemiae maturase K (matK) gene, partial cds; chloroplast
JN202238	Billbergia euphemiae maturase K (matK) gene, partial cds; chloroplast
JN202239	Billbergia euphemiae maturase K (matK) gene, partial cds; chloroplast
HQ900680	Brewcaria reflexa isolate BRO-0176 tRNA-Lys (trnK) gene, intron; and maturase K (matK) gene, partial cds; chloroplast
EU681908	Brocchinia acuminata isolate F19a tRNA-Lys (trnK) gene, partial sequence; and maturase K (matK) gene, complete cds; chloroplast
AF162228	Brocchinia acuminata maturase K (matK) gene, complete cds; chloroplast
KX754117	Brocchinia micrantha isolate B150 trnK-UUU gene, partial sequence; and maturase K (matK) gene, complete cds; plastid
HQ180857	Brocchinia micrantha maturase K (matK) gene, partial cds; plastid
AY614017	Brocchinia tatei MB-116 tRNA-Lys (trnK) gene, partial sequence; and maturase K (matK) gene, complete cds; chloroplast
JX649230	Canistropsis microps isolate H301 maturase K (matK) gene, partial cds; chloroplast
JN202245	Canistrum aurantiacum maturase K (matK) gene, partial cds; chloroplast
JN202246	Canistrum aurantiacum maturase K (matK) gene, partial cds; chloroplast
AY950024	Canistrum fosterianum isolate H047 tRNA-Lys (trnK) gene, partial sequence; and maturase K (matK) gene, complete cds; chloroplast
EU681898	Catopsis floribunda isolate F10a tRNA-Lys (trnK) gene, partial sequence; and maturase K (matK) gene, complete cds; chloroplast
AY614025	Catopsis morreniana MB-106 tRNA-Lys (trnK) gene, partial sequence; and maturase K (matK) gene, complete cds; chloroplast
KX754166	Catopsis nitida isolate B463 trnK-UUU gene, partial sequence; and maturase K (matK) gene, complete cds; plastid
KX754101	Catopsis nutans isolate B2 trnK-UUU gene, partial sequence; and maturase K (matK) gene, complete cds; plastid
AY614026	Catopsis nutans var. nutans MB-2 tRNA-Lys (trnK) gene, partial sequence; and maturase K (matK) gene, complete cds; chloroplast
KX754171	Catopsis paniculata isolate B507 trnK-UUU gene, partial sequence; and maturase K (matK) gene, complete cds; plastid
AY614028	Catopsis subulata MB-105 tRNA-Lys (trnK) gene, partial sequence; and maturase K (matK) gene, complete cds; chloroplast
AF162230	Cottendorfia florida maturase K (matK) gene, complete cds; chloroplast
JX649252	Cryptanthus colnagoi isolate H303 maturase K (matK) gene, partial cds; chloroplast
JX649253	Cryptanthus diamantinensis isolate H311 maturase K (matK) gene, partial cds; chloroplast
JX649254	Cryptanthus odoratissimus isolate BB122 maturase K (matK) gene, partial cds; chloroplast
EU681895	Deuterocohnia brevifolia isolate F42a tRNA-Lys (trnK) gene, partial sequence; and maturase K (matK) gene, complete cds; chloroplast
EU681889	Deuterocohnia brevispicata isolate F51a tRNA-Lys (trnK) gene, partial sequence; and maturase K (matK) gene, complete cds; chloroplast
EU681893	Deuterocohnia glandulosa isolate F43a tRNA-Lys (trnK) gene, partial sequence; and maturase K (matK) gene, complete cds; chloroplast
FJ968210	Deuterocohnia longipetala isolate R231 maturase K (matK) gene, partial cds; chloroplast
AF162231	Deuterocohnia longipetala maturase K (matK) gene, complete cds; chloroplast
EU681894	Deuterocohnia lotteae isolate F44a tRNA-Lys (trnK) gene, partial sequence; and maturase K (matK) gene, complete cds; chloroplast
EU681888	Deuterocohnia scapigera isolate F45a tRNA-Lys (trnK) gene, partial sequence; and maturase K (matK) gene, complete cds; chloroplast
EU681885	Dyckia estevesii isolate F40a tRNA-Lys (trnK) gene, partial sequence; and maturase K (matK) gene, complete cds; chloroplast
EU681886	Dyckia estevesii isolate F50a tRNA-Lys (trnK) gene, partial sequence; and maturase K (matK) gene, complete cds; chloroplast
AF162235	Dyckia ferox maturase K (matK) gene, complete cds; chloroplast
EU681884	Dyckia goehringii isolate F39a tRNA-Lys (trnK) gene, partial sequence; and maturase K (matK) gene, complete cds; chloroplast
JX649257	Edmundoa ambigua isolate BB124 maturase K (matK) gene, partial cds; chloroplast
KU762889	Edmundoa ambigua voucher MSBG 1987-0264A (Living specimen) trnK gene, partial sequence; and maturase K (matK) gene, complete cds; chloroplast
AY950012	Edmundoa lindenii isolate H213 tRNA-Lys (trnK) gene, partial sequence; and maturase K (matK) gene, complete cds; chloroplast
EU681903	Edmundoa lindenii var. rosaea isolate F49a tRNA-Lys (trnK) gene, partial sequence; and maturase K (matK) gene, complete cds; chloroplast
JX649258	Edmundoa perplexa isolate BB125 maturase K (matK) gene, partial cds; chloroplast
AF539967	Edmundoa perplexa maturase K (matK) gene, complete cds; chloroplast
JF295093	Eduandrea selloana maturase K (matK) gene, partial cds; chloroplast
EU681843	Fosterella albicans isolate 62a tRNA-Lys (trnK) gene, partial sequence; and maturase K (matK) gene, complete cds; chloroplast
EU681846	Fosterella albicans isolate 64a tRNA-Lys (trnK) gene, partial sequence; and maturase K (matK) gene, complete cds; chloroplast
EU681838	Fosterella albicans isolate 94c tRNA-Lys (trnK) gene, partial sequence; and maturase K (matK) gene, complete cds; chloroplast
HQ167772	Fosterella albicans isolate B011 tRNA-Lys (trnK) gene, intron; and maturase K (matK) gene, complete cds; chloroplast
HQ167787	Fosterella albicans isolate B030 tRNA-Lys (trnK) gene, intron; and maturase K (matK) gene, complete cds; chloroplast
HQ167788	Fosterella albicans isolate B031 tRNA-Lys (trnK) gene, intron; and maturase K (matK) gene, complete cds; chloroplast
HQ167789	Fosterella albicans isolate B032 tRNA-Lys (trnK) gene, intron; and maturase K (matK) gene, complete cds; chloroplast
AY949994	Fosterella albicans isolate H156 tRNA-Lys (trnK) gene, partial sequence; and maturase K (matK) gene, complete cds; chloroplast
FJ968217	Fosterella albicans isolate R262 maturase K (matK) gene, partial cds; chloroplast
EU681840	Fosterella caulescens isolate 3a tRNA-Lys (trnK) gene, partial sequence; and maturase K (matK) gene, complete cds; chloroplast
EU681845	Fosterella caulescens isolate 80a tRNA-Lys (trnK) gene, partial sequence; and maturase K (matK) gene, partial cds; chloroplast
AY949995	Fosterella caulescens isolate H158 tRNA-Lys (trnK) gene, partial sequence; and maturase K (matK) gene, complete cds; chloroplast
HQ180866	Fosterella caulescens maturase K (matK) gene, partial cds; plastid
EU681863	Fosterella christophii isolate 25f tRNA-Lys (trnK) gene, partial sequence; and maturase K (matK) gene, complete cds; chloroplast
HQ167773	Fosterella christophii isolate B012 tRNA-Lys (trnK) gene, intron; and maturase K (matK) gene, complete cds; chloroplast
HQ167774	Fosterella christophii isolate B013 tRNA-Lys (trnK) gene, intron; and maturase K (matK) gene, complete cds; chloroplast
EU681923	Fosterella gracilis isolate 117a tRNA-Lys (trnK) gene, partial sequence; and maturase K (matK) gene, complete cds; chloroplast
EU681862	Fosterella micrantha isolate 132a tRNA-Lys (trnK) gene, partial sequence; and maturase K (matK) gene, complete cds; chloroplast
EU681860	Fosterella micrantha isolate 133a tRNA-Lys (trnK) gene, partial sequence; and maturase K (matK) gene, complete cds; chloroplast
HQ167791	Fosterella micrantha isolate B034 tRNA-Lys (trnK) gene, intron; and maturase K (matK) gene, complete cds; chloroplast
KY114864	Fosterella micrantha voucher Salazar-Chavez 7196 tRNA-Lys (trnK) gene, intron; and maturase K (matK) gene, complete cds; chloroplast
EU681919	Fosterella penduliflora isolate 34a tRNA-Lys (trnK) gene, partial sequence; and maturase K (matK) gene, complete cds; chloroplast
EU681870	Fosterella penduliflora isolate 35a tRNA-Lys (trnK) gene, partial sequence; and maturase K (matK) gene, complete cds; chloroplast
EU681868	Fosterella penduliflora isolate 45c tRNA-Lys (trnK) gene, partial sequence; and maturase K (matK) gene, complete cds; chloroplast
EU681867	Fosterella penduliflora isolate 46d tRNA-Lys (trnK) gene, partial sequence; and maturase K (matK) gene, complete cds; chloroplast
EU681871	Fosterella penduliflora isolate 50b tRNA-Lys (trnK) gene, partial sequence; and maturase K (matK) gene, complete cds; chloroplast
EU681874	Fosterella penduliflora isolate 55a tRNA-Lys (trnK) gene, partial sequence; and maturase K (matK) gene, complete cds; chloroplast
EU681914	Fosterella penduliflora isolate 93a tRNA-Lys (trnK) gene, partial sequence; and maturase K (matK) gene, complete cds; chloroplast
HQ167775	Fosterella penduliflora isolate B014 tRNA-Lys (trnK) gene, intron; and maturase K (matK) gene, complete cds; chloroplast
HQ167776	Fosterella penduliflora isolate B015 tRNA-Lys (trnK) gene, intron; and maturase K (matK) gene, complete cds; chloroplast
HQ167792	Fosterella penduliflora isolate B035 tRNA-Lys (trnK) gene, intron; and maturase K (matK) gene, complete cds; chloroplast
AY949996	Fosterella penduliflora isolate H086 tRNA-Lys (trnK) gene, partial sequence; and maturase K (matK) gene, complete cds; chloroplast
HQ167777	Fosterella petiolata isolate B016 tRNA-Lys (trnK) gene, intron; and maturase K (matK) gene, complete cds; chloroplast
HQ167778	Fosterella petiolata isolate B017 tRNA-Lys (trnK) gene, intron; and maturase K (matK) gene, complete cds; chloroplast
AF162242	Fosterella petiolata maturase K (matK) gene, complete cds; chloroplast
EU681847	Fosterella robertreadii isolate 135b tRNA-Lys (trnK) gene, partial sequence; and maturase K (matK) gene, complete cds; chloroplast
EU681922	Fosterella robertreadii isolate 137b tRNA-Lys (trnK) gene, partial sequence; and maturase K (matK) gene, complete cds; chloroplast
HQ167780	Fosterella robertreadii isolate B019 tRNA-Lys (trnK) gene, intron; and maturase K (matK) gene, complete cds; chloroplast
EU681854	Fosterella rusbyi isolate 60a tRNA-Lys (trnK) gene, partial sequence; and maturase K (matK) gene, complete cds; chloroplast
EU681842	Fosterella rusbyi isolate 107b tRNA-Lys (trnK) gene, partial sequence; and maturase K (matK) gene, complete cds; chloroplast
HQ167781	Fosterella rusbyi isolate B020 tRNA-Lys (trnK) gene, intron; and maturase K (matK) gene, complete cds; chloroplast
EU681912	Fosterella schidosperma isolate 86a tRNA-Lys (trnK) gene, partial sequence; and maturase K (matK) gene, complete cds; chloroplast
EU681855	Fosterella vasquezii isolate 23a tRNA-Lys (trnK) gene, partial sequence; and maturase K (matK) gene, complete cds; chloroplast
EU681856	Fosterella vasquezii isolate 63b tRNA-Lys (trnK) gene, partial sequence; and maturase K (matK) gene, complete cds; chloroplast
EU681861	Fosterella villosula isolate 104a tRNA-Lys (trnK) gene, partial sequence; and maturase K (matK) gene, complete cds; chloroplast
HQ167785	Fosterella villosula isolate B026 tRNA-Lys (trnK) gene, intron; and maturase K (matK) gene, complete cds; chloroplast
HQ167786	Fosterella villosula isolate B027 tRNA-Lys (trnK) gene, intron; and maturase K (matK) gene, complete cds; chloroplast
EU681910	Fosterella weberbaueri isolate 95c tRNA-Lys (trnK) gene, partial sequence; and maturase K (matK) gene, complete cds; chloroplast
EU681911	Fosterella weberbaueri isolate 121a tRNA-Lys (trnK) gene, partial sequence; and maturase K (matK) gene, complete cds; chloroplast
EU681857	Fosterella weberbaueri isolate 138b tRNA-Lys (trnK) gene, partial sequence; and maturase K (matK) gene, complete cds; chloroplast
EU681881	Fosterella weddelliana isolate 36a tRNA-Lys (trnK) gene, partial sequence; and maturase K (matK) gene, complete cds; chloroplast
EU681875	Fosterella weddelliana isolate 37a tRNA-Lys (trnK) gene, partial sequence; and maturase K (matK) gene, complete cds; chloroplast
EU681882	Fosterella weddelliana isolate 56a tRNA-Lys (trnK) gene, partial sequence; and maturase K (matK) gene, complete cds; chloroplast
EU681879	Fosterella weddelliana isolate 145a tRNA-Lys (trnK) gene, partial sequence; and maturase K (matK) gene, complete cds; chloroplast
HQ167782	Fosterella windischii isolate B021 tRNA-Lys (trnK) gene, intron; and maturase K (matK) gene, complete cds; chloroplast
HQ167783	Fosterella windischii isolate B022 tRNA-Lys (trnK) gene, intron; and maturase K (matK) gene, complete cds; chloroplast
KX754216	Goudaea ospinae isolate B1254 trnK-UUU gene, partial sequence; and maturase K (matK) gene, complete cds; plastid
KX754215	Goudaea ospinae var. gruberi isolate B1253 trnK-UUU gene, partial sequence; and maturase K (matK) gene, complete cds; plastid
KX754168	Guzmania coriostachya isolate B481 trnK-UUU gene, partial sequence; and maturase K (matK) gene, complete cds; plastid
AY614054	Guzmania monostachia var. monostachia MB-22 tRNA-Lys (trnK) gene, partial sequence; and maturase K (matK) gene, complete cds; chloroplast
AY614061	Guzmania multiflora MB-94 tRNA-Lys (trnK) gene, partial sequence; and maturase K (matK) gene, complete cds; chloroplast
AY614058	Guzmania musaica var. musaica MB-14 tRNA-Lys (trnK) gene, partial sequence; and maturase K (matK) gene, complete cds; chloroplast
AY614065	Guzmania patula MB-11 tRNA-Lys (trnK) gene, partial sequence; and maturase K (matK) gene, complete cds; chloroplast
AY614064	Guzmania rhonhofiana MB-96 tRNA-Lys (trnK) gene, partial sequence; and maturase K (matK) gene, complete cds; chloroplast
AY614055	Guzmania variegata MB-15 tRNA-Lys (trnK) gene, partial sequence; and maturase K (matK) gene, complete cds; chloroplast
AY949991	Guzmania wittmackii isolate H017 tRNA-Lys (trnK) gene, partial sequence; and maturase K (matK) gene, complete cds; chloroplast
AY614056	Guzmania wittmackii MB-12 tRNA-Lys (trnK) gene, partial sequence; and maturase K (matK) gene, complete cds; chloroplast
EU681833	Hechtia argentea isolate F11a tRNA-Lys (trnK) gene, partial sequence; and maturase K (matK) gene, complete cds; chloroplast
AY614020	Hechtia carlsoniae MB-79 tRNA-Lys (trnK) gene, partial sequence; and maturase K (matK) gene, complete cds; chloroplast
KU762781	Hohenbergia inermis voucher Aguirre-Santoro 1807 (IJ) trnK gene, partial sequence; and maturase K (matK) gene, complete cds; chloroplast
JX649260	Hohenbergia polycephala isolate BB126 maturase K (matK) gene, partial cds; chloroplast
JX649261	Hohenbergia proctorii isolate BB127 maturase K (matK) gene, partial cds; chloroplast
KU762788	Hohenbergia proctorii voucher Aguirre-Santoro 1811 (IJ) trnK gene, partial sequence; and maturase K (matK) gene, complete cds; chloroplast
KU762843	Hohenbergia rosea voucher Read sn (SEL) trnK gene, partial sequence; and maturase K (matK) gene, complete cds; chloroplast
AY950026	Hohenbergia stellata isolate H037 tRNA-Lys (trnK) gene, partial sequence; and maturase K (matK) gene, complete cds; chloroplast
AY950020	Hohenbergiopsis guatemalensis isolate H138 tRNA-Lys (trnK) gene, partial sequence; and maturase K (matK) gene, complete cds; chloroplast
KU762806	Hohenbergiopsis guatemalensis voucher MSBG 1987-0446A (Living specimen) trnK gene, partial sequence; and maturase K (matK) gene, complete cds; chloroplast
KX754108	Lemeltonia dodsonii isolate B127 trnK-UUU gene, partial sequence; and maturase K (matK) gene, complete cds; plastid
AY950000	Lymania alvimii isolate H087 tRNA-Lys (trnK) gene, partial sequence; and maturase K (matK) gene, complete cds; chloroplast
KU762846	Lymania alvimii voucher MSBG 1989-0280A (Living specimen) trnK gene, partial sequence; and maturase K (matK) gene, complete cds; chloroplast
JX649263	Lymania corallina isolate H307 maturase K (matK) gene, partial cds; chloroplast
KU762801	Lymania corallina voucher MSBG 1996-0662A (Living specimen) trnK gene, partial sequence; and maturase K (matK) gene, complete cds; chloroplast
KU762847	Lymania spiculata voucher MSBG 2001-0246A (Living specimen) trnK gene, partial sequence; and maturase K (matK) gene, complete cds; chloroplast
KX754207	Mezobromelia capituligera isolate B978 trnK-UUU gene, partial sequence; and maturase K (matK) gene, complete cds; plastid
KX754222	Mezobromelia capituligera isolate B1294 trnK-UUU gene, partial sequence; and maturase K (matK) gene, complete cds; plastid
KX754226	Mezobromelia capituligera isolate B1299 trnK-UUU gene, partial sequence; and maturase K (matK) gene, complete cds; plastid
KX754122	Navia saxicola isolate B182 trnK-UUU gene, partial sequence; and maturase K (matK) gene, complete cds; plastid
HQ900684	Navia saxicola isolate BRO-0182 tRNA-Lys (trnK) gene, intron; and maturase K (matK) gene, partial cds; chloroplast
AY950051	Neoglaziovia variegata isolate H052 tRNA-Lys (trnK) gene, partial sequence; and maturase K (matK) gene, complete cds; chloroplast
KU258043	Neoglaziovia variegata maturase K (matK) gene, complete cds; chloroplast
FJ968169	Neoregelia cruenta isolate B172 maturase K (matK) gene, partial cds; chloroplast
JN202258	Nidularium innocentii maturase K (matK) gene, partial cds; chloroplast
JN202260	Nidularium innocentii maturase K (matK) gene, partial cds; chloroplast
EU780847	Orthophytum disjunctum isolate KEW 238160 tRNA-Lys (trnK) gene, partial sequence; and maturase K (matK) gene, complete cds; chloroplast
KU762750	Orthophytum disjunctum voucher Leme 5026 (SEL) trnK gene, partial sequence; and maturase K (matK) gene, partial cds; chloroplast
JX649271	Orthophytum vagans isolate H308 maturase K (matK) gene, partial cds; chloroplast
EU681837	Pitcairnia atrorubens isolate F34a tRNA-Lys (trnK) gene, partial sequence; and maturase K (matK) gene, complete cds; chloroplast
EU681890	Pitcairnia breedlovei isolate F14a tRNA-Lys (trnK) gene, partial sequence; and maturase K (matK) gene, complete cds; chloroplast
AF162254	Pitcairnia heterophylla maturase K (matK) gene, complete cds; chloroplast
EU681892	Pitcairnia rubronigriflora isolate F48a tRNA-Lys (trnK) gene, partial sequence; and maturase K (matK) gene, complete cds; chloroplast
EU780849	Portea grandiflora isolate KEW 23822 tRNA-Lys (trnK) gene, partial sequence; and maturase K (matK) gene, complete cds; chloroplast
JX649272	Portea kermesina isolate B006 maturase K (matK) gene, partial cds; chloroplast
AY950053	Portea petropolitana var. extensa isolate H053 tRNA-Lys (trnK) gene, partial sequence; and maturase K (matK) gene, complete cds; chloroplast
KX754107	Pseudalcantarea grandis isolate B125 trnK-UUU gene, partial sequence; and maturase K (matK) gene, complete cds; plastid
KY114830	Pseudalcantarea grandis voucher Maria Flores 1307 tRNA-Lys (trnK) gene, intron; and maturase K (matK) gene, complete cds; chloroplast
AY949998	Puya alpestris isolate H060 tRNA-Lys (trnK) gene, partial sequence; and maturase K (matK) gene, complete cds; chloroplast
AY949997	Puya densiflora isolate H076 tRNA-Lys (trnK) gene, partial sequence; and maturase K (matK) gene, complete cds; chloroplast
EU780853	Puya ferruginea isolate KEW 23826 tRNA-Lys (trnK) gene, partial sequence; and maturase K (matK) gene, complete cds; chloroplast
FJ968225	Puya ferruginea isolate R282 maturase K (matK) gene, partial cds; chloroplast
EU681901	Puya herzogii isolate F53a tRNA-Lys (trnK) gene, partial sequence; and maturase K (matK) gene, complete cds; chloroplast
HQ180883	Puya laxa maturase K (matK) gene, partial cds; plastid
AY614022	Puya laxa MB-78 tRNA-Lys (trnK) gene, partial sequence; and maturase K (matK) gene, complete cds; chloroplast
EU681902	Puya spathacea isolate F52a tRNA-Lys (trnK) gene, partial sequence; and maturase K (matK) gene, complete cds; chloroplast
FJ968192	Puya yakespala isolate R199 maturase K (matK) gene, partial cds; chloroplast
EU780850	Quesnelia arvensis isolate KEW 23821 tRNA-Lys (trnK) gene, partial sequence; and maturase K (matK) gene, complete cds; chloroplast
JN202269	Quesnelia kautskyi maturase K (matK) gene, partial cds; chloroplast
JN202270	Quesnelia kautskyi maturase K (matK) gene, partial cds; chloroplast
AY950047	Quesnelia lateralis isolate H051 tRNA-Lys (trnK) gene, partial sequence; and maturase K (matK) gene, complete cds; chloroplast
AY950048	Quesnelia liboniana isolate H220 tRNA-Lys (trnK) gene, partial sequence; and maturase K (matK) gene, complete cds; chloroplast
KX754176	Racinaea fraseri isolate B547 trnK-UUU gene, partial sequence; and maturase K (matK) gene, complete cds; plastid
EU681906	Racinaea fraseri isolate F26a tRNA-Lys (trnK) gene, partial sequence; and maturase K (matK) gene, complete cds; chloroplast
KX754164	Racinaea multiflora isolate B426 trnK-UUU gene, partial sequence; and maturase K (matK) gene, complete cds; plastid
EU681921	Racinaea pugiformis isolate F25a tRNA-Lys (trnK) gene, partial sequence; and maturase K (matK) gene, complete cds; chloroplast
AY614083	Racinaea ropalocarpa MB-57 tRNA-Lys (trnK) gene, partial sequence; and maturase K (matK) gene, complete cds; chloroplast
AY614082	Racinaea spiculosa var. spiculosa MB-99 tRNA-Lys (trnK) gene, partial sequence; and maturase K (matK) gene, complete cds; chloroplast
AY950001	Ronnbergia petersii isolate H120 tRNA-Lys (trnK) gene, partial sequence; and maturase K (matK) gene, complete cds; chloroplast
KU762792	Ronnbergia silvana voucher Leme 5131 (HB) trnK gene, partial sequence; and maturase K (matK) gene, complete cds; chloroplast
AY614131	Tillandsia aeranthos MB-111 tRNA-Lys (trnK) gene, partial sequence; and maturase K (matK) gene, complete cds; chloroplast
KX754127	Tillandsia albertiana isolate B212 trnK-UUU gene, partial sequence; and maturase K (matK) gene, complete cds; plastid
AY614117	Tillandsia albertiana MB-33 tRNA-Lys (trnK) gene, partial sequence; and maturase K (matK) gene, complete cds; chloroplast
KY114807	Tillandsia albida voucher Flores s.n. tRNA-Lys (trnK) gene, intron; and maturase K (matK) gene, complete cds; chloroplast
AY614124	Tillandsia argentina MB-87 tRNA-Lys (trnK) gene, partial sequence; and maturase K (matK) gene, complete cds; chloroplast
KY114806	Tillandsia atroviridipetala voucher Flores s.n. tRNA-Lys (trnK) gene, intron; and maturase K (matK) gene, complete cds; chloroplast
KX754136	Tillandsia aurea isolate B250 trnK-UUU gene, partial sequence; and maturase K (matK) gene, complete cds; plastid
KX754126	Tillandsia australis isolate B203 trnK-UUU gene, partial sequence; and maturase K (matK) gene, complete cds; plastid
KY114810	Tillandsia balbisiana voucher Torres 1390 tRNA-Lys (trnK) gene, intron; and maturase K (matK) gene, complete cds; chloroplast
AY614123	Tillandsia bermejoensis MB-34 tRNA-Lys (trnK) gene, partial sequence; and maturase K (matK) gene, complete cds; chloroplast
FM956450	Tillandsia bourgaei chloroplast partial tRNA-Lys intron and matK gene for maturase K, specimen voucher MEXU:C. Granados 305
KY114814	Tillandsia brachycaulos voucher Granados-Mendoza 272 tRNA-Lys (trnK) gene, intron; and maturase K (matK) gene, complete cds; chloroplast
JN202271	Tillandsia bulbosa maturase K (matK) gene, partial cds; chloroplast
KY114815	Tillandsia bulbosa voucher Salazar-Chavez 8632 tRNA-Lys (trnK) gene, intron; and maturase K (matK) gene, complete cds; chloroplast
KY114816	Tillandsia butzii voucher Granados-Mendoza 405 tRNA-Lys (trnK) gene, intron; and maturase K (matK) gene, complete cds; chloroplast
AY614070	Tillandsia cacticola MB-44 tRNA-Lys (trnK) gene, partial sequence; and maturase K (matK) gene, complete cds; chloroplast
KU848367	Tillandsia calcicola isolate JP105 trnK gene, intron; and maturase K (matK) gene, partial cds; chloroplast
KU519653	Tillandsia caloura maturase K gene, partial cds; chloroplast
KU197147	Tillandsia capillaris isolate A4 tRNA-Lys (trnK) gene, intron; and maturase K (matK) gene, complete cds; chloroplast
KU197154	Tillandsia capillaris isolate A12 tRNA-Lys (trnK) gene, intron; and maturase K (matK) gene, complete cds; chloroplast
KU197155	Tillandsia capillaris isolate A13 tRNA-Lys (trnK) gene, intron; and maturase K (matK) gene, complete cds; chloroplast
KU197156	Tillandsia capillaris isolate A14 tRNA-Lys (trnK) gene, intron; and maturase K (matK) gene, complete cds; chloroplast
KU197157	Tillandsia capillaris isolate A15 tRNA-Lys (trnK) gene, intron; and maturase K (matK) gene, complete cds; chloroplast
KU197158	Tillandsia capillaris isolate A17 tRNA-Lys (trnK) gene, intron; and maturase K (matK) gene, complete cds; chloroplast
KU197161	Tillandsia capillaris isolate A21 tRNA-Lys (trnK) gene, intron; and maturase K (matK) gene, complete cds; chloroplast
KU197162	Tillandsia capillaris isolate A22 tRNA-Lys (trnK) gene, intron; and maturase K (matK) gene, complete cds; chloroplast
KU197163	Tillandsia capillaris isolate A23 tRNA-Lys (trnK) gene, intron; and maturase K (matK) gene, complete cds; chloroplast
KU197164	Tillandsia capillaris isolate A24 tRNA-Lys (trnK) gene, intron; and maturase K (matK) gene, complete cds; chloroplast
KU197165	Tillandsia capillaris isolate A25 tRNA-Lys (trnK) gene, intron; and maturase K (matK) gene, complete cds; chloroplast
KU197166	Tillandsia capillaris isolate A26 tRNA-Lys (trnK) gene, intron; and maturase K (matK) gene, complete cds; chloroplast
KU197167	Tillandsia capillaris isolate A29 tRNA-Lys (trnK) gene, intron; and maturase K (matK) gene, complete cds; chloroplast
KU197168	Tillandsia capillaris isolate A32 tRNA-Lys (trnK) gene, intron; and maturase K (matK) gene, complete cds; chloroplast
KU197179	Tillandsia capillaris isolate A45 tRNA-Lys (trnK) gene, intron; and maturase K (matK) gene, complete cds; chloroplast
KU197180	Tillandsia capillaris isolate A46 tRNA-Lys (trnK) gene, intron; and maturase K (matK) gene, complete cds; chloroplast
KU197181	Tillandsia capillaris isolate A47 tRNA-Lys (trnK) gene, intron; and maturase K (matK) gene, complete cds; chloroplast
KU197104	Tillandsia capillaris isolate B4 tRNA-Lys (trnK) gene, intron; and maturase K (matK) gene, complete cds; chloroplast
KU197106	Tillandsia capillaris isolate B6 tRNA-Lys (trnK) gene, intron; and maturase K (matK) gene, complete cds; chloroplast
KU197109	Tillandsia capillaris isolate B9 tRNA-Lys (trnK) gene, intron; and maturase K (matK) gene, complete cds; chloroplast
KU197111	Tillandsia capillaris isolate B11 tRNA-Lys (trnK) gene, intron; and maturase K (matK) gene, complete cds; chloroplast
KU197112	Tillandsia capillaris isolate B12 tRNA-Lys (trnK) gene, intron; and maturase K (matK) gene, complete cds; chloroplast
KU197115	Tillandsia capillaris isolate B15 tRNA-Lys (trnK) gene, intron; and maturase K (matK) gene, complete cds; chloroplast
KU197116	Tillandsia capillaris isolate B17 tRNA-Lys (trnK) gene, intron; and maturase K (matK) gene, complete cds; chloroplast
KU197127	Tillandsia capillaris isolate B29 tRNA-Lys (trnK) gene, intron; and maturase K (matK) gene, complete cds; chloroplast
KU197128	Tillandsia capillaris isolate B31 tRNA-Lys (trnK) gene, intron; and maturase K (matK) gene, complete cds; chloroplast
KU197131	Tillandsia capillaris isolate B35 tRNA-Lys (trnK) gene, intron; and maturase K (matK) gene, complete cds; chloroplast
KU197141	Tillandsia capillaris isolate B47 tRNA-Lys (trnK) gene, intron; and maturase K (matK) gene, complete cds; chloroplast
KU197142	Tillandsia capillaris isolate B48 tRNA-Lys (trnK) gene, intron; and maturase K (matK) gene, complete cds; chloroplast
KX754206	Tillandsia capillaris isolate B916 trnK-UUU gene, partial sequence; and maturase K (matK) gene, complete cds; plastid
KX754232	Tillandsia capillaris isolate B1592 trnK-UUU gene, partial sequence; and maturase K (matK) gene, complete cds; plastid
KU197144	Tillandsia capillaris isolate C2 tRNA-Lys (trnK) gene, intron; and maturase K (matK) gene, complete cds; chloroplast
KU197145	Tillandsia capillaris isolate C3 tRNA-Lys (trnK) gene, intron; and maturase K (matK) gene, complete cds; chloroplast
KU197089	Tillandsia capillaris isolate P1 tRNA-Lys (trnK) gene, intron; and maturase K (matK) gene, complete cds; chloroplast
KU197090	Tillandsia capillaris isolate P2 tRNA-Lys (trnK) gene, intron; and maturase K (matK) gene, complete cds; chloroplast
KU197092	Tillandsia capillaris isolate P4 tRNA-Lys (trnK) gene, intron; and maturase K (matK) gene, complete cds; chloroplast
KU197093	Tillandsia capillaris isolate P5 tRNA-Lys (trnK) gene, intron; and maturase K (matK) gene, complete cds; chloroplast
KU197094	Tillandsia capillaris isolate P6 tRNA-Lys (trnK) gene, intron; and maturase K (matK) gene, complete cds; chloroplast
KU197095	Tillandsia capillaris isolate P7 tRNA-Lys (trnK) gene, intron; and maturase K (matK) gene, complete cds; chloroplast
KU197096	Tillandsia capillaris isolate P8 tRNA-Lys (trnK) gene, intron; and maturase K (matK) gene, complete cds; chloroplast
KU197097	Tillandsia capillaris isolate P9 tRNA-Lys (trnK) gene, intron; and maturase K (matK) gene, complete cds; chloroplast
KU197100	Tillandsia capillaris isolate P13 tRNA-Lys (trnK) gene, intron; and maturase K (matK) gene, complete cds; chloroplast
KY114819	Tillandsia capitata voucher Granados-Mendoza 309 tRNA-Lys (trnK) gene, intron; and maturase K (matK) gene, complete cds; chloroplast
KX754158	Tillandsia cochabambae isolate B392 trnK-UUU gene, partial sequence; and maturase K (matK) gene, complete cds; plastid
KX754177	Tillandsia complanata isolate B562 trnK-UUU gene, partial sequence; and maturase K (matK) gene, complete cds; plastid
KY114820	Tillandsia concolor voucher Flores Maria 1808 tRNA-Lys (trnK) gene, intron; and maturase K (matK) gene, complete cds; chloroplast
KX754193	Tillandsia denudata var. vivipara isolate B750 trnK-UUU gene, partial sequence; and maturase K (matK) gene, complete cds; plastid
KX754125	Tillandsia disticha isolate B202 trnK-UUU gene, partial sequence; and maturase K (matK) gene, complete cds; plastid
KU848346	Tillandsia disticha isolate B0233 trnK gene, intron; and maturase K (matK) gene, partial cds; chloroplast
AY614068	Tillandsia disticha MB-48 tRNA-Lys (trnK) gene, partial sequence; and maturase K (matK) gene, complete cds; chloroplast
AY614119	Tillandsia duratii var. duratii MB-88 tRNA-Lys (trnK) gene, partial sequence; and maturase K (matK) gene, complete cds; chloroplast
KX754163	Tillandsia edithae isolate B425 trnK-UUU gene, partial sequence; and maturase K (matK) gene, complete cds; plastid
FM956447	Tillandsia erubescens chloroplast partial tRNA-Lys intron and matK gene for maturase K, specimen voucher MEXU:C. Granados 360
KX754165	Tillandsia espinosae isolate B462 trnK-UUU gene, partial sequence; and maturase K (matK) gene, complete cds; plastid
AY614120	Tillandsia esseriana MB-69 tRNA-Lys (trnK) gene, partial sequence; and maturase K (matK) gene, complete cds; chloroplast
KX754189	Tillandsia fasciculata isolate B717 trnK-UUU gene, partial sequence; and maturase K (matK) gene, complete cds; plastid
AY614100	Tillandsia fasciculata var. fasciculata MB-76 tRNA-Lys (trnK) gene, partial sequence; and maturase K (matK) gene, complete cds; chloroplast
AY614116	Tillandsia fendleri var. fendleri MB-9 tRNA-Lys (trnK) gene, partial sequence; and maturase K (matK) gene, complete cds; chloroplast
KX754134	Tillandsia ferreyrae isolate B241 trnK-UUU gene, partial sequence; and maturase K (matK) gene, complete cds; plastid
KX754199	Tillandsia filifolia isolate B790 trnK-UUU gene, partial sequence; and maturase K (matK) gene, complete cds; plastid
KU848416	Tillandsia flabellata isolate JP069N maturase K (matK) gene, intron and partial cds; chloroplast
KX754151	Tillandsia floribunda isolate B351 trnK-UUU gene, partial sequence; and maturase K (matK) gene, complete cds; plastid
KU848381	Tillandsia fresnilloensis isolate JP018 trnK gene, intron; and maturase K (matK) gene, partial cds; chloroplast
KX754157	Tillandsia fuchsii isolate B391 trnK-UUU gene, partial sequence; and maturase K (matK) gene, complete cds; plastid
KU848366	Tillandsia fuchsii isolate JP017 trnK gene, intron; and maturase K (matK) gene, partial cds; chloroplast
AY614118	Tillandsia funebris MB-89 tRNA-Lys (trnK) gene, partial sequence; and maturase K (matK) gene, complete cds; chloroplast
AY614104	Tillandsia gardneri var. gardneri MB-41 tRNA-Lys (trnK) gene, partial sequence; and maturase K (matK) gene, complete cds; chloroplast
KU848412	Tillandsia guatemalensis isolate B0008 trnK gene, intron; and maturase K (matK) gene, partial cds; chloroplast
KU848413	Tillandsia guatemalensis isolate JP072 trnK gene, intron; and maturase K (matK) gene, partial cds; chloroplast
AY614092	Tillandsia guatemalensis MB-8 tRNA-Lys (trnK) gene, partial sequence; and maturase K (matK) gene, complete cds; chloroplast
AY614093	Tillandsia guatemalensis MB-104 tRNA-Lys (trnK) gene, partial sequence; and maturase K (matK) gene, complete cds; chloroplast
KX754131	Tillandsia heteromorpha isolate B224 trnK-UUU gene, partial sequence; and maturase K (matK) gene, complete cds; plastid
KX754104	Tillandsia heterophylla isolate B47 trnK-UUU gene, partial sequence; and maturase K (matK) gene, complete cds; plastid
KX754198	Tillandsia hildae isolate B763 trnK-UUU gene, partial sequence; and maturase K (matK) gene, complete cds; plastid
KU848355	Tillandsia hildae isolate JP040 trnK gene, intron; and maturase K (matK) gene, partial cds; chloroplast
AY614099	Tillandsia ionantha var. ionantha MB-84 tRNA-Lys (trnK) gene, partial sequence; and maturase K (matK) gene, complete cds; chloroplast
AY614129	Tillandsia ixioides MB-43 tRNA-Lys (trnK) gene, partial sequence; and maturase K (matK) gene, complete cds; chloroplast
KX754188	Tillandsia juerg-rutschmannii isolate B715 trnK-UUU gene, partial sequence; and maturase K (matK) gene, complete cds; plastid
FM956443	Tillandsia juncea chloroplast partial tRNA-Lys intron and matK gene for maturase K, specimen voucher MEXU:C. Granados 285
AY614097	Tillandsia juncea MB-73 tRNA-Lys (trnK) gene, partial sequence; and maturase K (matK) gene, complete cds; chloroplast
AY614103	Tillandsia kauffmannii MB-74 tRNA-Lys (trnK) gene, partial sequence; and maturase K (matK) gene, complete cds; chloroplast
KX754155	Tillandsia kirschnekii isolate B384 trnK-UUU gene, partial sequence; and maturase K (matK) gene, complete cds; plastid
AY614096	Tillandsia klausii MB-85 tRNA-Lys (trnK) gene, partial sequence; and maturase K (matK) gene, complete cds; chloroplast
KX754175	Tillandsia lajensis isolate B546 trnK-UUU gene, partial sequence; and maturase K (matK) gene, complete cds; plastid
KX754162	Tillandsia landbeckii subsp. andina isolate B423 trnK-UUU gene, partial sequence; and maturase K (matK) gene, complete cds; plastid
AY614108	Tillandsia latifolia var. divaricata MB-68 tRNA-Lys (trnK) gene, partial sequence; and maturase K (matK) gene, complete cds; chloroplast
FM210793	Tillandsia lepidosepala chloroplast partial tRNA-Lys gene, intron region and partial matK gene for maturase K, specimen voucher Kak.Haa TL001
KX754130	Tillandsia lepidosepala isolate B219 trnK-UUU gene, partial sequence; and maturase K (matK) gene, complete cds; plastid
KX754203	Tillandsia lotteae isolate B820 trnK-UUU gene, partial sequence; and maturase K (matK) gene, complete cds; plastid
KX754204	Tillandsia lotteae isolate B822 trnK-UUU gene, partial sequence; and maturase K (matK) gene, complete cds; plastid
KX754213	Tillandsia lymanii isolate B1236 trnK-UUU gene, partial sequence; and maturase K (matK) gene, complete cds; plastid
AY614109	Tillandsia macbrideana var. macbrideana MB-70 tRNA-Lys (trnK) gene, partial sequence; and maturase K (matK) gene, complete cds; chloroplast
KY114840	Tillandsia magnusiana voucher Granados-Mendoza 332 tRNA-Lys (trnK) gene, intron; and maturase K (matK) gene, complete cds; chloroplast
FM956439	Tillandsia makoyana chloroplast partial tRNA-Lys intron and matK gene for maturase K, specimen voucher MEXU:C. Granados 278
KU848397	Tillandsia makoyana isolate JP008 trnK gene, intron; and maturase K (matK) gene, partial cds; chloroplast
KU848399	Tillandsia makoyana isolate JP048 trnK gene, intron; and maturase K (matK) gene, partial cds; chloroplast
KU848400	Tillandsia makoyana isolate JP051 trnK gene, intron; and maturase K (matK) gene, partial cds; chloroplast
KX754112	Tillandsia malzinei isolate B145 trnK-UUU gene, partial sequence; and maturase K (matK) gene, complete cds; plastid
KX754170	Tillandsia malzinei isolate B492 trnK-UUU gene, partial sequence; and maturase K (matK) gene, complete cds; plastid
AY614069	Tillandsia marconae MB-98 tRNA-Lys (trnK) gene, partial sequence; and maturase K (matK) gene, complete cds; chloroplast
KU848351	Tillandsia mima isolate JP091 trnK gene, intron; and maturase K (matK) gene, partial cds; chloroplast
KY114841	Tillandsia mirabilis voucher Granados-Mendoza 387 tRNA-Lys (trnK) gene, intron; and maturase K (matK) gene, complete cds; chloroplast
AY614112	Tillandsia multicaulis MB-107 tRNA-Lys (trnK) gene, partial sequence; and maturase K (matK) gene, complete cds; chloroplast
KX754149	Tillandsia nana isolate B343 trnK-UUU gene, partial sequence; and maturase K (matK) gene, complete cds; plastid
KX754160	Tillandsia paleacea isolate B404 trnK-UUU gene, partial sequence; and maturase K (matK) gene, complete cds; plastid
JN202274	Tillandsia polystachia maturase K (matK) gene, partial cds; chloroplast
KY114846	Tillandsia polystachia voucher Granados-Mendoza 357 tRNA-Lys (trnK) gene, intron; and maturase K (matK) gene, complete cds; chloroplast
KX754143	Tillandsia propagulifera isolate B310 trnK-UUU gene, partial sequence; and maturase K (matK) gene, complete cds; plastid
KU848350	Tillandsia propagulifera isolate JP043 trnK gene, intron; and maturase K (matK) gene, partial cds; chloroplast
AY614110	Tillandsia pseudomacbrideana MB-36 tRNA-Lys (trnK) gene, partial sequence; and maturase K (matK) gene, complete cds; chloroplast
KX754150	Tillandsia pseudomicans isolate B347 trnK-UUU gene, partial sequence; and maturase K (matK) gene, complete cds; plastid
KU848362	Tillandsia punctulata isolate B0061 trnK gene, intron; and maturase K (matK) gene, partial cds; chloroplast
AY614087	Tillandsia punctulata MB-61 tRNA-Lys (trnK) gene, partial sequence; and maturase K (matK) gene, complete cds; chloroplast
KX754135	Tillandsia purpurea isolate B246 trnK-UUU gene, partial sequence; and maturase K (matK) gene, complete cds; plastid
AY614101	Tillandsia rauhii var. rauhii MB-92 tRNA-Lys (trnK) gene, partial sequence; and maturase K (matK) gene, complete cds; chloroplast
FM956435	Tillandsia recurvata chloroplast partial tRNA-Lys intron and matK gene for maturase K, specimen voucher MEXU:C. Granados 282
KX754174	Tillandsia recurvata isolate B529 trnK-UUU gene, partial sequence; and maturase K (matK) gene, complete cds; plastid
AY614095	Tillandsia remota MB-72 tRNA-Lys (trnK) gene, partial sequence; and maturase K (matK) gene, complete cds; chloroplast
KY114849	Tillandsia roseoscapa voucher Salazar-Chavez 9487 tRNA-Lys (trnK) gene, intron; and maturase K (matK) gene, complete cds; chloroplast
FM956434	Tillandsia schiedeana chloroplast partial tRNA-Lys intron and matK gene for maturase K, specimen voucher MEXU:C. Granados 317
KX754172	Tillandsia secunda isolate B527 trnK-UUU gene, partial sequence; and maturase K (matK) gene, complete cds; plastid
KX754173	Tillandsia secunda isolate B528 trnK-UUU gene, partial sequence; and maturase K (matK) gene, complete cds; plastid
KX754214	Tillandsia setacea isolate B1246 trnK-UUU gene, partial sequence; and maturase K (matK) gene, complete cds; plastid
KX754153	Tillandsia sphaerocephala isolate B366 trnK-UUU gene, partial sequence; and maturase K (matK) gene, complete cds; plastid
KX754197	Tillandsia spiraliflora isolate B762 trnK-UUU gene, partial sequence; and maturase K (matK) gene, complete cds; plastid
KU848349	Tillandsia spiraliflora isolate JP104 trnK gene, intron; and maturase K (matK) gene, partial cds; chloroplast
KY114852	Tillandsia streptophylla voucher Salazar-Chavez 8696 tRNA-Lys (trnK) gene, intron; and maturase K (matK) gene, complete cds; chloroplast
JN202277	Tillandsia tenuifolia maturase K (matK) gene, partial cds; chloroplast
AY614132	Tillandsia tenuifolia var. tenuifolia MB-26 tRNA-Lys (trnK) gene, partial sequence; and maturase K (matK) gene, complete cds; chloroplast
KX754124	Tillandsia teres isolate B201 trnK-UUU gene, partial sequence; and maturase K (matK) gene, complete cds; plastid
KY114857	Tillandsia tortilis voucher Maria Flores s.n. tRNA-Lys (trnK) gene, intron; and maturase K (matK) gene, complete cds; chloroplast
KY114858	Tillandsia tricolor voucher Granados-Mendoza 418 tRNA-Lys (trnK) gene, intron; and maturase K (matK) gene, complete cds; chloroplast
AY614122	Tillandsia usneoides MB-83 tRNA-Lys (trnK) gene, partial sequence; and maturase K (matK) gene, complete cds; chloroplast
AY614091	Tillandsia utriculata f. utriculata MB-27 tRNA-Lys (trnK) gene, partial sequence; and maturase K (matK) gene, complete cds; chloroplast
AY614090	Tillandsia utriculata f. utriculata MB-100 tRNA-Lys (trnK) gene, partial sequence; and maturase K (matK) gene, complete cds; chloroplast
KU848369	Tillandsia utriculata isolate B0100 trnK gene, intron; and maturase K (matK) gene, partial cds; chloroplast
KU848371	Tillandsia utriculata isolate B0747 trnK gene, intron; and maturase K (matK) gene, partial cds; chloroplast
KX754201	Tillandsia utriculata isolate B807 trnK-UUU gene, partial sequence; and maturase K (matK) gene, complete cds; plastid
KU848370	Tillandsia utriculata isolate JP006 trnK gene, intron; and maturase K (matK) gene, partial cds; chloroplast
KU848372	Tillandsia utriculata isolate JP060 trnK gene, intron; and maturase K (matK) gene, partial cds; chloroplast
KU848379	Tillandsia utriculata subsp. pringlei isolate B0734 trnK gene, intron; and maturase K (matK) gene, partial cds; chloroplast
KU848377	Tillandsia utriculata subsp. pringlei isolate B0735 trnK gene, intron; and maturase K (matK) gene, partial cds; chloroplast
KU848378	Tillandsia utriculata subsp. pringlei isolate B0736 trnK gene, intron; and maturase K (matK) gene, partial cds; chloroplast
KU848375	Tillandsia utriculata subsp. pringlei isolate JP004 trnK gene, intron; and maturase K (matK) gene, partial cds; chloroplast
KU848376	Tillandsia utriculata subsp. pringlei isolate JP0733 trnK gene, intron; and maturase K (matK) gene, partial cds; chloroplast
KY114859	Tillandsia utriculata voucher Torres R. 17935 tRNA-Lys (trnK) gene, intron; and maturase K (matK) gene, complete cds; chloroplast
AY614078	Tillandsia werneriana MB-67 tRNA-Lys (trnK) gene, partial sequence; and maturase K (matK) gene, complete cds; chloroplast
AY614125	Tillandsia xiphioides var. xiphioides MB-40 tRNA-Lys (trnK) gene, partial sequence; and maturase K (matK) gene, complete cds; chloroplast
KX754224	Vriesea elata isolate B1297 trnK-UUU gene, partial sequence; and maturase K (matK) gene, complete cds; plastid
KU762864	Aechmea andersoniana voucher Leme 4365-TYPE (HB) trnK gene, partial sequence; and maturase K (matK) gene, partial cds; chloroplast
KU762798	Aechmea chantinii voucher MSBG 1997-0351A (Living specimen) trnK gene, partial sequence; and maturase K (matK) gene, complete cds; chloroplast
AY950034	Aechmea fasciata isolate K5 tRNA-Lys (trnK) gene, partial sequence; and maturase K (matK) gene, complete cds; chloroplast
AY950033	Aechmea fulgens isolate H144 tRNA-Lys (trnK) gene, partial sequence; and maturase K (matK) gene, complete cds; chloroplast
KU762762	Aechmea incompta voucher Leme 3746 (Living specimen) trnK gene, partial sequence; and maturase K (matK) gene, complete cds; chloroplast
AY950029	Aechmea lueddemanniana isolate H150 tRNA-Lys (trnK) gene, partial sequence; and maturase K (matK) gene, complete cds; chloroplast
JN202225	Aechmea nudicaulis maturase K (matK) gene, partial cds; chloroplast
KU762764	Aechmea patentissima voucher Rydey, R. s.n. (SEL) trnK gene, partial sequence; and maturase K (matK) gene, complete cds; chloroplast
JN202228	Aechmea phanerophlebia maturase K (matK) gene, partial cds; chloroplast
KU762834	Aechmea tonduzii voucher Clark 153 (SEL) trnK gene, partial sequence; and maturase K (matK) gene, complete cds; chloroplast
JX649240	Aechmea turbinocalyx isolate K24459 maturase K (matK) gene, partial cds; chloroplast
AY614015	Brocchinia micrantha MB-115 tRNA-Lys (trnK) gene, partial sequence; and maturase K (matK) gene, complete cds; chloroplast
JN202244	Canistrum aurantiacum maturase K (matK) gene, partial cds; chloroplast
JX649250	Canistrum camacaense isolate H302 maturase K (matK) gene, complete cds; chloroplast
JX649251	Catopsis floribunda isolate F10 maturase K (matK) gene, partial cds; chloroplast
AF162232	Deuterocohnia lotteae maturase K (matK) gene, partial cds; chloroplast
HQ167771	Fosterella albicans isolate B010 tRNA-Lys (trnK) gene, intron; and maturase K (matK) gene, complete cds; chloroplast
EU681839	Fosterella caulescens isolate 142b tRNA-Lys (trnK) gene, partial sequence; and maturase K (matK) gene, complete cds; chloroplast
EU681866	Fosterella penduliflora isolate 22c tRNA-Lys (trnK) gene, partial sequence; and maturase K (matK) gene, complete cds; chloroplast
HQ167779	Fosterella robertreadii isolate B018 tRNA-Lys (trnK) gene, intron; and maturase K (matK) gene, complete cds; chloroplast
EU681853	Fosterella rusbyi isolate 141b tRNA-Lys (trnK) gene, partial sequence; and maturase K (matK) gene, complete cds; chloroplast
EU681865	Fosterella villosula isolate 136b tRNA-Lys (trnK) gene, partial sequence; and maturase K (matK) gene, complete cds; chloroplast
EU681858	Fosterella weberbaueri isolate 48d tRNA-Lys (trnK) gene, partial sequence; and maturase K (matK) gene, complete cds; chloroplast
EU681880	Fosterella weddelliana isolate 58c tRNA-Lys (trnK) gene, partial sequence; and maturase K (matK) gene, complete cds; chloroplast
EU681851	Fosterella windischii isolate 139b tRNA-Lys (trnK) gene, partial sequence; and maturase K (matK) gene, complete cds; chloroplast
JN202259	Nidularium innocentii maturase K (matK) gene, partial cds; chloroplast
KU848380	Tillandsia albida isolate JP016 trnK gene, intron; and maturase K (matK) gene, partial cds; chloroplast
JN202272	Tillandsia bulbosa maturase K (matK) gene, partial cds; chloroplast
KU197178	Tillandsia capillaris isolate A44 tRNA-Lys (trnK) gene, intron; and maturase K (matK) gene, complete cds; chloroplast
AY614127	Tillandsia didisticha MB-38 tRNA-Lys (trnK) gene, partial sequence; and maturase K (matK) gene, complete cds; chloroplast
AF539978	Tillandsia espinosae maturase K (matK) gene, partial cds; chloroplast
FM210792	Tillandsia fasciculata chloroplast partial tRNA-Lys gene, intron region and partial matK gene for maturase K, specimen voucher Wrinkle TF2
FM956446	Tillandsia filifolia chloroplast partial tRNA-Lys intron and matK gene for maturase K, specimen voucher CHAPA:M. Flores sn
AY614094	Tillandsia guatemalensis MB-103 tRNA-Lys (trnK) gene, partial sequence; and maturase K (matK) gene, complete cds; chloroplast
AY614111	Tillandsia heterophylla MB-47 tRNA-Lys (trnK) gene, partial sequence; and maturase K (matK) gene, complete cds; chloroplast
KX754212	Tillandsia lymanii isolate B1098 trnK-UUU gene, partial sequence; and maturase K (matK) gene, complete cds; plastid
KU848398	Tillandsia makoyana isolate JP028 trnK gene, intron; and maturase K (matK) gene, partial cds; chloroplast
JN202275	Tillandsia polystachia maturase K (matK) gene, partial cds; chloroplast
KU848348	Tillandsia secunda isolate JP063 trnK gene, intron; and maturase K (matK) gene, partial cds; chloroplast
JN202276	Tillandsia tenuifolia maturase K (matK) gene, partial cds; chloroplast
AY614121	Tillandsia usneoides MB-109 tRNA-Lys (trnK) gene, partial sequence; and maturase K (matK) gene, complete cds; chloroplast
KU848368	Tillandsia utriculata isolate B0807 trnK gene, intron; and maturase K (matK) gene, partial cds; chloroplast
